# Supplementary material for: Diurnal predators of restocked lab-reared and wild Diadema antillarum near artificial reefs in Saba
Source: PeerJ. 2023 Oct 12;11:e16189. doi: 10.7717/peerj.16189 (PMC10576963; doi:10.7717/peerj.16189)
Supplement: Data S1 — All data collected during the experiment and the structure of the dataset. [file peerj-11-16189-s001.xlsx]

## Sheet: Meta data
Metadata
Experiment has been performed by Mika de Breuyn (meikedebreuyn@gmail.com) and Alex van der Last (alexvanderlast@outlook.com) under supervision of Alwin Hylkema (alwin.hylkema@hvhl.nl).
Tab "Retention count per reef"
reef	number of the artificial reef, around which the sighting takes place, reef numbers can be found on yellow tags on rebars next to the artificial reef, numbers are 60-71
treatment	the treatments used on the artificial reefs: "diademacity" (uncaged wild urchins) and "nursery" (uncaged lab-reared urchins), "caged_diademacity" (caged wild urchins) and "caged_nursery" (caged lab-reared urchins)
count0	count of restocked urchins (in n) 0 days after introduction per ARTIFICIAL REEF, introduction took place on 13.04.2021
count1	count of restocked urchins (in n) 1 days after introduction
count2	count of restocked urchins (in n) 2 days after introduction
count3	count of restocked urchins (in n) 3 days after introduction
count6	count of restocked urchins (in n) 6 days after introduction
count7	count of restocked urchins (in n) 7 days after introduction
count10	count of restocked urchins (in n) 10 days after introduction
count36	count of restocked urchins (in n) 36 days after introduction
retention0	retention of restocked urchins (%) 0 days after introduction, retention = the count of Diadema on the respective artificial reef after transplanting divided by the count of Diadema on the respective reef after action took place * 100. ex: 4/3*100=75%
retention1	retention of restocked urchins (%) 1 days after introduction
retention2	retention of restocked urchins (%) 2 days after introduction
retention3	retention of restocked urchins (%) 3 days after introduction
retention6	retention of restocked urchins (%) 6 days after introduction
retention7	retention of restocked urchins (%) 7 days after introduction
retention10	retention of restocked urchins (%) 10 days after introduction
retention36	retention of restocked urchins (%) 36 days after introduction
Tab "Retention count per shelter"
reef	number of the artificial reef, around which the sighting takes place, reef numbers can be found on yellow tags on rebars next to the artificial reef, numbers are 60-71
treatment	the treatments used on the artificial reefs: "diademacity" (uncaged wild urchins) and "nursery" (uncaged lab-reared urchins), "caged_diademacity" (caged wild urchins) and "caged_nursery" (caged lab-reared urchins)
shelter_id	location of shelter within the artificial reefs. T=top, b=bottom, l=left, r=right, m=middle
day	days after start of experiment, day0=13.04.21
amount_attacks	amount of attacks sighted for respective shelter on respective artificial reef
urchin_count	count of restocked urchins in respective shelter
Tab "Retention overview"
experiment	name of the respective experiment, pilot experiments 1-3, main experiment
treatment	the treatments used on the artificial reefs: "diademacity" (uncaged wild urchins) and "nursery" (uncaged lab-reared urchins), "caged_diademacity" (caged wild urchins) and "caged_nursery" (caged lab-reared urchins)
final_retention	retention = the count of Diadema on the respective artificial reef after transplanting divided by the count of Diadema on the respective reef after action took place * 100. ex: 4/3*100=75%
count0	count of restocked urchins (in n) 0 days after introduction, introduction took place on 13.04.2021
count1	count of restocked urchins (in n) 1 days after introduction
count2	count of restocked urchins (in n) 2 days after introduction
count3	count of restocked urchins (in n) 3 days after introduction
count4	count of restocked urchins (in n) 4 days after introduction
count6	count of restocked urchins (in n) 6 days after introduction
count7	count of restocked urchins (in n) 7 days after introduction
count10	count of restocked urchins (in n) 10 days after introduction
retention0	retention of restocked urchins (%) 0 days after introduction, retention = the count of Diadema on the respective artificial reef after transplanting divided by the count of Diadema on the respective reef after action took place * 100. ex: 4/3*100=75%
retention1	retention of restocked urchins (%) 1 days after introduction
retention2	retention of restocked urchins (%) 2 days after introduction
retention3	retention of restocked urchins (%) 3 days after introduction
retention4	retention of restocked urchins (%) 4 days after introduction
retention6	retention of restocked urchins (%) 6 days after introduction
retention7	retention of restocked urchins (%) 7 days after introduction
retention10	retention of restocked urchins (%) 10 days after introduction
date_count0	date 0 days after introduction of restocked urchins
time_count0	time 0 days after introduction of restocked urchins
date_count1	date 1 days after introduction of restocked urchins
time_count1	time 1 days after introduction of restocked urchins
date_count2	date 2 days after introduction of restocked urchins
time_count2	time 2 days after introduction of restocked urchins
date_count3	date 3 days after introduction of restocked urchins
time_count3	time 3 days after introduction of restocked urchins
date_count4	date 4 days after introduction of restocked urchins
time_count4	time 4 days after introduction of restocked urchins
date_count6	date 6 days after introduction of restocked urchins
time_count6	time 6 days after introduction of restocked urchins
date_count7	date 7 days after introduction of restocked urchins
time_count7	time 7 days after introduction of restocked urchins
date_count10	date 10 days after introduction of restocked urchins
time_count10	time 10 days after introduction of restocked urchins
comments	any additional remarks
Tab "R Retention"
reef	number of the artificial reef, around which the sighting takes place, reef numbers can be found on yellow tags on rebars next to the artificial reef, numbers are 60-71
source	source: wild or lab-reared urchins
treatment	caging: caged or uncaged urchins
day	day of the experiment
alive	No of urchins alive at that monitoring
dead	No of urchins dead at that monitoring (restocked - alive)
retention	retention of restocked urchins (%), retention = the count of Diadema on the respective artificial reef after transplanting divided by the count of Diadema on the respective reef after action took place * 100. ex: 4/3*100=75%
proportion	retention as a proportion (between 0-1)
Tab "Size measurements"
name	name of the respective experiment, pilot experiments 1-3, main experiment
date	date where the measurement of the respective urchin was taken
origin	the location where the respective urchin was taken from: nursery, diademacity (dive site), harbour (Fort Bay)
size	size of urchin in mm measured with caliper of the test (body without spine)
remarks	any additional remarks
Tab "Camera overview"
name	name of the respective experiment, pilot experiments 1-3, main experiment, follow-up experiment
location	location of shelter within the artificial reefs. T=top, b=bottom, l=left, r=right, m=middle
cam	number of camera, on which the sighting was recorded, camera numbers are 2-5 and can be found on the respective camera as well as on the underwater housings
start_date	date on which the recording started
end_date	date on which the recording ended
start_time	time at which the recording started
end_time	time at which the recording ended
setting	camera setting
run_time	total time (h, min) that the camera was running
run_time_min	total time (min) that the camera was running
frontreef_left	the reef number that was observed "front left" from the perspective of the camera
frontreef_right	the reef number that was observed "front right" from the perspective of the camera
backreef_left	the reef number that was observed "back left" from the perspective of the camera
backreef_right	the reef number that was observed "back left" from the perspective of the camera
distance_reefs	distance (m) fbetween artificial reefs
distance_cameras	distance (m) from camera to artificial reef
height_cameras	height (cm) on which the camera was installed
remarks	any additional remarks
Tab "Picture analysis"
Raw data of camera experiment
name	name of the respective experiment, pilot experiments 1-3, main experiment
date	date on which observation was done
cam	camera number, 2, 3, 4, 5
reef1	artificial reef number on which predator/prey interaction was observed
shelter_id	location of shelter within the artificial reefs. T=top, b=bottom, l=left, r=right, m=middle
day	day of the experiment
time_start	time of the day at which picture was taken, 10:53 am , 13:20 equivalent to 1:20 pm (20 passed 1 pm)
t	time (min)
count	count (n) of urchin in respective shelter based on the retention count that is done on the respective morning
sighting	sighting of potential predators (as listed in manuscript) or Diadema with/without potential preator
action	specific action that takes place on the picture: only predator and unknown sightings: 1 Present in water column or on sand outside of 50cm virtual cylinder around reef; only predator, unknown and non-predator sightings: 2 Present around reef inside 50cm virtual cylinder around reef, 3 Interacting in direct contact with the reef or inside of the reef, 4 Attacking in crevice, 5 Attacking on sand; o…
image	image number as found in the pictures folder on the SD card
visit	no of independent queen triggerfish visit of that day. So 1 means the first visit of that day, etc. Independent visits are defined as photos being at least 10 min apart from other photos with the same predator.
visitID	unique visit number, consisting of "day" & "." & "visit"
Tab "R attacks"
To determine if attacks during the day had an effect on retention during the following night.
reef	number of the artificial reef, around which the sighting takes place, reef numbers can be found on yellow tags on rebars next to the artificial reef, numbers are 60-71
treatment	the treatments used on the artificial reefs: "diademacity" (uncaged wild urchins) and "nursery" (uncaged lab-reared urchins), "caged_diademacity" (caged wild urchins) and "caged_nursery" (caged lab-reared urchins)
shelter_id	location of shelter within the artificial reefs. T=top, b=bottom, l=left, r=right, m=middle
day	days after start of experiment, day0=13.04.21
Attacks	amount of attacks (code 4) sighted for respective shelter on respective artificial reef
urchin_count_beginning_this_day	amount of D. antillarum that were counted on that respective day (diver retention counts)
urchin_count_beginning_next_day	amount of D. antillarum that were counted on the following day (diver retention counts)
urchin_difference	the number of urchins calculated as amount of urchins from respective day - following day
Tab "Table predators"
Number of times a code was recorded per predator. Draws data from tab "picture analysis"
name	name of potential predator
total_sightings	number of pictures the predator was sighted on
code1	D. antillarum potential predator is present outside of a 50 cm virtual sphere around the artificial reef.
code2	D. antillarum potential predator is present within a 50 cm virtual sphere around the artificial reef, but not within 10 cm radius around the shelter entrance.
code3	D. antillarum potential predator is present within 10 cm around the shelter entrance of the artificial reef.
code4	Interaction between D. antillarum potential predator and D. antillarum on the artificial reef.
code5	D. antillarum potential predator is present within a 50 cm virtual cylinder around D. antillarum which is located outside the shelter.
code6	D. antillarum potential predator attacks D. antillarum which is located outside the shelter.
code7	D. antillarum potential predator feeds on D. antillarum outside the shelter.
Tab "Table independent visits"
Number of independent queen triggerfish visits. Draws data from tab "picture analysis"
Visit ID	unique visit number, consisting of "day" & "." & "visit"
Day	day of experiment
Visit	no of independent queen triggerfish visit of that day. So 1 means the first visit of that day, etc. Independent visits are defined as photos being at least 10 min apart from other photos with the same predator.
Photos	no of photos with the same visit no
Time min	first photo of the visit
Time max	last photo of the visit
Duration	time max - time min
Day	day of experiment
Independent visits (n)	no of independent visits of that day
Camera running time (h)	time that at least 2 cameras were running (see camera overview tab)
Indendent visits (n/h)	independent visits/ camera running time
Mean duration	average duration time for that day
St dev duration	st. dev of the duration time
Start first visit	time min for that day
End last visit	time max for that day
Wild vs. lab table
Number of times a code was recorded for each reef. Data is derived from tab "Picture analysis".
Tab "R wild vs lab Queen trigger"
To determine if lab or wild urchins had more interest or interactions. Data is copy pasted out the tab "wild vs. lab table"
reef	number of the artificial reef, around which the sighting takes place, reef numbers can be found on yellow tags on rebars next to the artificial reef, numbers are 60-71
treatment	the treatments used on the artificial reefs: "diademacity" (uncaged wild urchins) and "nursery" (uncaged lab-reared urchins), "caged_diademacity" (caged wild urchins) and "caged_nursery" (caged lab-reared urchins)
Close	Number of times a code 2 (predator <50 cm) was recorded for respective reef. Only Queen triggerfish sightings
Interested	Number of times a code 3 (predator <10 cm) was recorded for respective reef. Only Queen triggerfish sightings
Interaction	Number of times a code 4 (predator-prey interaction) was recorded for respective reef. Only Queen triggerfish sightings
Tab "Roving diver survey"
date	date on which survey was conducted
start_time	time at which survey begon
researcher	researcher initials that collected data, AL=Alex van der Last, AH= Alwin Hylkema, MD= Mareike de Breuyn
species	fish species codes according to datasheet of "Fish assemblages of three common artificial reef designs during early colonization"
0-5	size class of sighted fish in cm
6-10	size class of sighted fish in cm
11-20	size class of sighted fish in cm
21-30	size class of sighted fish in cm
31-40	size class of sighted fish in cm
41-50	size class of sighted fish in cm
>50	size class of sighted fish in cm

## Sheet: Retention count per reef
reef	treatment	count0	count1	count2	count3	count6	count7	count10	count36	retention0	retention1	retention2	retention3	retention6	retention7	retention10	retention36
62	diademacity	4	3	3	3	3	3	4	1	100	75	75	75	75	100	100	25
64	diademacity	4	2	1	1	0	0	0	0	100	50	25	25	0	0	0	0
68	diademacity	4	3	2	2	1	1	0	0	100	75	50	50	25	25	0	0
70	diademacity	4	3	3	3	1	1	1	0	100	75	75	75	25	25	25	0
61	nursery	4	4	4	3	2	1	0	1	100	100	100	75	50	25	0	25
63	nursery	4	4	3	3	3	3	2	0	100	100	75	75	75	75	50	0
67	nursery	4	4	3	3	0	0	0	0	100	100	75	75	0	0	0	0
69	nursery	4	3	2	2	2	2	2	0	100	75	50	50	50	50	50	0
60	diademacity_cage	4	4	4	4	4	4	4	2	100	100	100	100	100	100	100	50
66	diademacity_cage	4	4	4	4	4	4	4	4	100	100	100	100	100	100	100	100
65	nursery_cage	4	4	4	4	4	4	4	3	100	100	100	100	100	100	100	75
71	nursery_cage	4	3	3	3	3	3	3	1	100	75	75	75	75	75	75	25
	sum all	48	41	36	35	27	26	24	12
	sum without cages	32	26	21	20	12	11	9	2

## Sheet: Retention count per shelter 
reef	treatment	shelter_id	day	amount_attacks	urchin_count
62	diademacity	t_l	0	0	1
62	diademacity	t_r	0	0	1
62	diademacity	b_l	0	0	1
62	diademacity	b_r	0	4	1
62	diademacity	t_l	1	0	1
62	diademacity	t_r	1	0	1
62	diademacity	b_l	1	0	0
62	diademacity	b_r	1	0	1
62	diademacity	back_t_l	1	0	0
62	diademacity	t_l	2	2	1
62	diademacity	t_r	2	3	1
62	diademacity	b_l	2	5	0
62	diademacity	b_r	2	2	0
62	diademacity	back_t_l	2	0	1
64	diademacity	t_l	0	2	1
64	diademacity	t_r	0	3	1
64	diademacity	b_l	0	5	1
64	diademacity	b_r	0	2	1
64	diademacity	t_l	1	0	1
64	diademacity	t_r	1	0	1
64	diademacity	b_l	1	0	0
64	diademacity	b_r	1	0	0
64	diademacity	t_l	2	0	1
64	diademacity	t_r	2	0	0
64	diademacity	b_l	2	0	0
64	diademacity	b_r	2	0	0
68	diademacity	t_l	0	4	1
68	diademacity	t_r	0	7	1
68	diademacity	b_l	0	2	1
68	diademacity	b_r	0	6	1
68	diademacity	back_t_r	0	0	0
68	diademacity	t_l	1	3	1
68	diademacity	t_r	1	0	0
68	diademacity	b_l	1	0	1
68	diademacity	b_r	1	0	0
68	diademacity	back_t_r	1	0	1
68	diademacity	t_l	2	0	0
68	diademacity	t_r	2	0	1
68	diademacity	b_l	2	0	1
68	diademacity	b_r	2	0	0
68	diademacity	b_r	2	0	0
70	diademacity	t_l	0	11	1
70	diademacity	t_r	0	2	1
70	diademacity	b_l	0	5	1
70	diademacity	b_r	0	4	1
70	diademacity	back_b_r	0	4	1
70	diademacity	t_l	1	0	0
70	diademacity	t_r	1	0	1
70	diademacity	b_l	1	0	0
70	diademacity	b_r	1	0	1
70	diademacity	back_b_r	1	0	1
70	diademacity	t_l	2	0	1
70	diademacity	t_r	2	2	1
70	diademacity	b_l	2	0	0
70	diademacity	b_r	2	0	1
61	nursery	t_l	0	1	1
61	nursery	t_r	0	1	1
61	nursery	b_l	0	1	1
61	nursery	b_r	0	2	1
61	nursery	t_l	1	0	1
61	nursery	t_r	1	0	2
61	nursery	b_l	1	0	1
61	nursery	b_r	1	0	0
61	nursery	t_m	1	0	0
61	nursery	t_l	2	0	1
61	nursery	t_r	2	0	1
61	nursery	b_l	2	0	1
61	nursery	b_r	2	0	0
61	nursery	t_m	2	0	1
63	nursery	t_l	0	0	1
63	nursery	t_r	0	1	1
63	nursery	b_l	0	1	1
63	nursery	b_r	0	2	1
63	nursery	t_l	1	0	1
63	nursery	t_r	1	1	1
63	nursery	b_l	1	0	1
63	nursery	b_r	1	0	1
63	nursery	t_m	1	0	0
63	nursery	t_l	2	0	1
63	nursery	t_r	2	0	1
63	nursery	b_l	2	0	0
63	nursery	b_r	2	0	1
63	nursery	t_m	2	0	1
67	nursery	t_l	0	1	1
67	nursery	t_r	0	3	1
67	nursery	b_l	0	0	1
67	nursery	b_r	0	1	1
67	nursery	t_l	1	0	1
67	nursery	t_r	1	1	1
67	nursery	b_l	1	1	1
67	nursery	b_r	1	0	1
67	nursery	t_l	2	0	1
67	nursery	t_r	2	0	0
67	nursery	b_l	2	0	1
67	nursery	b_r	2	0	1
69	nursery	t_l	0	0	1
69	nursery	t_r	0	2	1
69	nursery	b_l	0	1	1
69	nursery	b_r	0	1	1
69	nursery	t_l	1	1	1
69	nursery	t_r	1	2	1
69	nursery	b_l	1	0	0
69	nursery	b_r	1	1	1
69	nursery	t_l	2	0	1
69	nursery	t_r	2	1	1
69	nursery	b_l	2	0	0
69	nursery	b_r	2	0	0
62	diademacity	t_l	3
62	diademacity	t_r	3
62	diademacity	b_l	3
62	diademacity	b_r	3
64	diademacity	t_l	3
64	diademacity	t_r	3
64	diademacity	b_l	3
64	diademacity	b_r	3
68	diademacity	t_l	3
68	diademacity	t_r	3
68	diademacity	b_l	3
68	diademacity	b_r	3
68	diademacity	back_t_r	3
70	diademacity	t_l	3
70	diademacity	t_r	3
70	diademacity	b_l	3
70	diademacity	b_r	3
70	diademacity	back_b_r	3
61	nursery	t_l	3
61	nursery	t_r	3
61	nursery	b_l	3
61	nursery	b_r	3
63	nursery	t_l	3
63	nursery	t_r	3
63	nursery	b_l	3
63	nursery	b_r	3
67	nursery	t_l	3
67	nursery	t_r	3
67	nursery	b_l	3
67	nursery	b_r	3
69	nursery	t_l	3
69	nursery	t_r	3
69	nursery	b_l	3
69	nursery	b_r	3

## Sheet: Retention overview
experiment	treatment	final_retention	count0	count1	count2	count3	count4	count6	count7	count10	retention0	retention1	retention2	retention3	retention4	retention6	retention7	retention10	date_count0	time_count0	date_count1	time_count1	date_count2	time_count2	date_count3	time_count3	date_count4	time_count4	date_count6	time_count6	date_count7	time_count7	date_count10	time_count10	comments
pilot1	harbour	25	8	NA	NA	NA	2	NA	NA	NA	100	NA	NA	NA	25	NA	NA	NA	2021-03-22	14:31:00	NA	NA	NA	NA	NA	NA	2021-03-26	14:04:00	NA	NA	NA	NA	NA	NA
pilot2	harbour	0	8	NA	NA	NA	NA	NA	NA	0	100	NA	NA	NA	NA	NA	NA	0	2021-03-26 14:05:00	14:05:00	NA	NA	NA	NA	NA	NA	NA	NA	NA	NA	NA	NA	2021-04-01	14:09:00	within 2.5 hours 3/8 Diadema lost to predation
pilot3	harbour	12.5	16	NA	NA	2	NA	NA	NA	NA	100	NA	NA	12.5	NA	NA	NA	NA	2021-04-06	14:55:00	NA	NA	NA	NA	2021-04-09	10:08:00	NA	NA	NA	NA	NA	NA	NA	NA
main1	diademacity	31.25	16	11	9	9	NA	5	5	5	100	68.75	56.25	56.25	NA	31.25	31.25	31.25	2021-04-13	09:11:00	2021-04-14	09:11:00	2021-04-15	10:44:00	2021-04-16	10:24:00	NA	NA	2021-04-19	15:00:00	2021-04-20	13:24:00	2021-04-23	14:45:00
main1	nursery	25	16	15	12	11	NA	7	6	4	100	93.75	75	68.75	NA	43.75	37.5	25	2021-04-13	09:11:00	2021-04-14	09:11:00	2021-04-15	10:44:00	2021-04-16	10:24:00	NA	NA	2021-04-19	15:00:00	2021-04-20	13:24:00	2021-04-23	14:45:00
main1	diademacity_cage	100	8	8	8	8	NA	8	8	8	100	100	100	100	NA	100	100	100	2021-04-13	09:11:00	2021-04-14	09:11:00	2021-04-15	10:44:00	2021-04-16	10:24:00	NA	NA	2021-04-19	15:00:00	2021-04-20	13:24:00	2021-04-23	14:45:00
main1	nursery_cage	87.5	8	7	7	7	NA	7	7	7	100	87.5	87.5	87.5	NA	87.5	87.5	87.5	2021-04-13	09:11:00	2021-04-14	09:11:00	2021-04-15	10:44:00	2021-04-16	10:24:00	NA	NA	2021-04-19	15:00:00	2021-04-20	13:24:00	2021-04-23	14:45:00

## Sheet: R Retention 2.0
reef	source	treatment	day	alive	dead	retention	proportion
62	wild	uncaged	0	4	0	100	1
64	wild	uncaged	0	4	0	100	1
68	wild	uncaged	0	4	0	100	1
70	wild	uncaged	0	4	0	100	1
61	nursery	uncaged	0	4	0	100	1
63	nursery	uncaged	0	4	0	100	1
67	nursery	uncaged	0	4	0	100	1
69	nursery	uncaged	0	4	0	100	1
60	wild	caged	0	4	0	100	1
66	wild	caged	0	4	0	100	1
65	nursery	caged	0	4	0	100	1
71	nursery	caged	0	4	0	100	1
62	wild	uncaged	1	3	1	75	0.75
64	wild	uncaged	1	2	2	50	0.5
68	wild	uncaged	1	3	1	75	0.75
70	wild	uncaged	1	3	1	75	0.75
61	nursery	uncaged	1	4	0	100	1
63	nursery	uncaged	1	4	0	100	1
67	nursery	uncaged	1	4	0	100	1
69	nursery	uncaged	1	3	1	75	0.75
60	wild	caged	1	4	0	100	1
66	wild	caged	1	4	0	100	1
65	nursery	caged	1	4	0	100	1
71	nursery	caged	1	3	1	75	0.75
62	wild	uncaged	2	3	1	75	0.75
64	wild	uncaged	2	1	3	25	0.25
68	wild	uncaged	2	2	2	50	0.5
70	wild	uncaged	2	3	1	75	0.75
61	nursery	uncaged	2	4	0	100	1
63	nursery	uncaged	2	3	1	75	0.75
67	nursery	uncaged	2	3	1	75	0.75
69	nursery	uncaged	2	2	2	50	0.5
60	wild	caged	2	4	0	100	1
66	wild	caged	2	4	0	100	1
65	nursery	caged	2	4	0	100	1
71	nursery	caged	2	3	1	75	0.75
62	wild	uncaged	3	3	1	75	0.75
64	wild	uncaged	3	1	3	25	0.25
68	wild	uncaged	3	2	2	50	0.5
70	wild	uncaged	3	3	1	75	0.75
61	nursery	uncaged	3	3	1	75	0.75
63	nursery	uncaged	3	3	1	75	0.75
67	nursery	uncaged	3	3	1	75	0.75
69	nursery	uncaged	3	2	2	50	0.5
60	wild	caged	3	4	0	100	1
66	wild	caged	3	4	0	100	1
65	nursery	caged	3	4	0	100	1
71	nursery	caged	3	3	1	75	0.75
62	wild	uncaged	6	3	1	75	0.75
64	wild	uncaged	6	0	4	0	0
68	wild	uncaged	6	1	3	25	0.25
70	wild	uncaged	6	1	3	25	0.25
61	nursery	uncaged	6	2	2	50	0.5
63	nursery	uncaged	6	3	1	75	0.75
67	nursery	uncaged	6	0	4	0	0
69	nursery	uncaged	6	2	2	50	0.5
60	wild	caged	6	4	0	100	1
66	wild	caged	6	4	0	100	1
65	nursery	caged	6	4	0	100	1
71	nursery	caged	6	3	1	75	0.75
62	wild	uncaged	7	3	1	75	0.75
64	wild	uncaged	7	0	4	0	0
68	wild	uncaged	7	1	3	25	0.25
70	wild	uncaged	7	1	3	25	0.25
61	nursery	uncaged	7	1	3	25	0.25
63	nursery	uncaged	7	3	1	75	0.75
67	nursery	uncaged	7	0	4	0	0
69	nursery	uncaged	7	2	2	50	0.5
60	wild	caged	7	4	0	100	1
66	wild	caged	7	4	0	100	1
65	nursery	caged	7	4	0	100	1
71	nursery	caged	7	3	1	75	0.75
62	wild	uncaged	10	4	0	100	1
64	wild	uncaged	10	0	4	0	0
68	wild	uncaged	10	0	4	0	0
70	wild	uncaged	10	1	3	25	0.25
61	nursery	uncaged	10	0	4	0	0
63	nursery	uncaged	10	2	2	50	0.5
67	nursery	uncaged	10	0	4	0	0
69	nursery	uncaged	10	2	2	50	0.5
60	wild	caged	10	4	0	100	1
66	wild	caged	10	4	0	100	1
65	nursery	caged	10	4	0	100	1
71	nursery	caged	10	3	1	75	0.75
62	wild	uncaged	36	1	3	25	0.25
64	wild	uncaged	36	0	4	0	0
68	wild	uncaged	36	0	4	0	0
70	wild	uncaged	36	0	4	0	0
61	nursery	uncaged	36	1	3	25	0.25
63	nursery	uncaged	36	0	4	0	0
67	nursery	uncaged	36	0	4	0	0
69	nursery	uncaged	36	0	4	0	0
60	wild	caged	36	2	2	50	0.5
66	wild	caged	36	4	0	100	1
65	nursery	caged	36	3	1	75	0.75
71	nursery	caged	36	1	3	25	0.25

## Sheet: Size measurements
name	date	origin	size	remarks				origin	avg_size	stdev
pilot1	2021-03-22	harbour	58	2 per reef on 4 reefs				harbour	54.1333	9.86017
pilot1	2021-03-22	harbour	56					diadema_city	32.625	5.51529
pilot1	2021-03-22	harbour	60					nursery	24.75	4.03517
pilot1	2021-03-22	harbour	31
pilot1	2021-03-22	harbour	52
pilot1	2021-03-22	harbour	50
pilot1	2021-03-22	harbour	53
pilot1	2021-03-22	harbour	45
pilot2	2021-03-26	harbour	50	2 per reef on 4 reefs (2 left from pilot1)
pilot2	2021-03-26	harbour	55
pilot2	2021-03-26	harbour	57
pilot2	2021-03-26	harbour	58
pilot2	2021-03-26	harbour	60
pilot2	2021-03-26	harbour	57
pilot3	2021-04-06	harbour	62	2 per reef on 8 reefs (none left from pilot2)
pilot3	2021-04-06	harbour	62
pilot3	2021-04-06	harbour	60
pilot3	2021-04-06	harbour	81
pilot3	2021-04-06	harbour	60
pilot3	2021-04-06	harbour	42
pilot3	2021-04-06	harbour	60
pilot3	2021-04-06	harbour	46
pilot3	2021-04-06	harbour	44
pilot3	2021-04-06	harbour	37
pilot3	2021-04-06	harbour	70
pilot3	2021-04-06	harbour	62
pilot3	2021-04-06	harbour	45
pilot3	2021-04-06	harbour	45
pilot3	2021-04-06	harbour	53
pilot3	2021-04-06	harbour	53
main	2021-04-09	diadema_city	32	4 per reef on 12 reefs (2 left from pilot 3, removed on 09.04.21)
main	2021-04-09	diadema_city	30
main	2021-04-09	diadema_city	23
main	2021-04-09	diadema_city	39
main	2021-04-09	diadema_city	25
main	2021-04-09	diadema_city	23
main	2021-04-09	diadema_city	36
main	2021-04-09	diadema_city	25
main	2021-04-09	diadema_city	23
main	2021-04-09	diadema_city	36
main	2021-04-09	diadema_city	37
main	2021-04-09	diadema_city	34
main	2021-04-09	diadema_city	33
main	2021-04-09	diadema_city	28
main	2021-04-09	diadema_city	32
main	2021-04-09	diadema_city	30
main	2021-04-09	diadema_city	39
main	2021-04-09	diadema_city	34
main	2021-04-09	diadema_city	37
main	2021-04-09	diadema_city	36
main	2021-04-09	diadema_city	39
main	2021-04-09	diadema_city	37
main	2021-04-09	diadema_city	39
main	2021-04-09	diadema_city	36
main	2021-04-12	nursery	17
main	2021-04-12	nursery	33
main	2021-04-12	nursery	31
main	2021-04-12	nursery	31
main	2021-04-12	nursery	32
main	2021-04-12	nursery	24
main	2021-04-12	nursery	26
main	2021-04-12	nursery	27
main	2021-04-12	nursery	26
main	2021-04-12	nursery	25
main	2021-04-12	nursery	26
main	2021-04-12	nursery	26
main	2021-04-12	nursery	26
main	2021-04-12	nursery	23
main	2021-04-12	nursery	21
main	2021-04-12	nursery	24
main	2021-04-12	nursery	23
main	2021-04-12	nursery	25
main	2021-04-12	nursery	23
main	2021-04-12	nursery	20
main	2021-04-12	nursery	23
main	2021-04-12	nursery	20
main	2021-04-12	nursery	22
main	2021-04-12	nursery	20

## Sheet: Camera overview
name	location	cam	start_date	end_date	start_time	end_time	setting	run_time	run_time_min	frontreef_left	frontreef_right	backreef_left	backreef_right	distance_reefs	distance_cameras	height_cameras	remarks
test1	land	2	2021-03-08	2021-03-10	07:00:00	11:00:00	timelapse 30	52h									test for battery duration
pilot1	uw	2	2021-03-22	2021-03-24	14:31:00	16:31:00	timelapse 30	50h									distance reefs 3m, distance camera 2m
pilot1	uw	3	2021-03-22	2021-03-24	14:32:00	00:41:00	timelapse 30	34h 9min									distance reefs 3m, distance camera 2m
pilot2	uw	2	2021-03-26	2021-03-26	14:26:00	14:49:00	timelapse 5	23min									deployment cancelled, tie wrap failure
pilot2	uw	3	2021-03-26	2021-03-26	14:05:00	14:48:00	timelapse 30	43min									deployment cancelled, tie wrap failure
pilot2	uw	4	2021-03-26	2021-03-28	14:42:00	15:21:00	timelapse 10	48h 39min									distance reefs 1.5m, distance camera 1.5m
test2	land	3	2021-03-28	2021-03-30	12:28:00	20:34:00	timelapse 10	56h 6min									test for battery duration
test3	land	3	2021-03-31	2021-03-31	09:15:00	16:53:00	/	7h 38min									test for battery life red uw light
test4	land	5	2021-03-30	2021-04-01	09:29:00	19:03:00	timelapse 5	57h 34min									test for battery duration
test5	land	4	2021-03-30	2021-03-30	09:00:00	14:50:00	film 1080p	5h 50min
test6	land	2	2021-03-31	2021-04-01	10:07:00	00:36:00	timelapse 1	14h 29min
pilot3	uw	2	2021-04-06	2021-04-06	13:37:00	14:23:00	film 1080p	46min		62	61	69	70	100	80	55	distance reefs 1m, distance camera 0.8m, camera did not film reefs
pilot3	uw	5	2021-04-06	2021-04-08	14:55:00	18:41:00	5 time lapse	51h 46min		64	63	67	68	100	80	55	distance reefs 1m, distance camera 0.8m
pilot3	uw	3	2021-04-06	2021-04-08	14:59:00	19:04:00	timelapse 30	52h 55min		70	69	61	62	100	100	55	distance reefs 1m, distance camera 1m
pilot3	uw	4	2021-04-06	2021-04-07	12:15:00	02:26:00	timelapse 1	14h 11min		68	67	64	63	100	100	55	distance reefs 1m, distance camera 1m
main1	uw	2	2021-04-13	2021-04-15	12:26:00	07:06:00	timelapse 5	42h 40min	2560	68	67	64	63	100	80	40
main1	uw	3	2021-04-13	2021-04-15	12:26:00	10:45:00	timelapse 5	46h 23min	2783	70	69	61	62	100	80	40
main1	uw	4	2021-04-13	2021-04-13	12:26:00	18:42:00	timelapse 5	6h 16min	376	62	61	69	70	100	80	40
main1	uw	5	2021-04-13	2021-04-15	12:26:00	10:44:00	timelapse 5	46h 28min	2788	64	63	67	68	100	80	40
main2	uw	2	2021-04-16	2021-04-18	10:49:00	13:34:00	timelapse 5	50h 45min	3045	68	67	64	63	100	80	40
main2	uw	3	2021-04-16	2021-04-18	10:49:00	05:52:00	timelapse 5	43h 3min	2583	70	69	61	62	100	80	40
main2	uw	4	2021-04-16	2021-04-18	10:49:00	10:51:00	timelapse 5	48h 3min	2883	62	61	69	70	100	80	40
main2	uw	5	2021-04-16	2021-04-18	10:49:00	06:39:00	timelapse 5	43h 50min	2630	64	63	67	68	100	80	40
main3	uw	2	2021-04-20	2021-04-22	13:58:00	12:27:00	timelapse 5	46h 29min	2789	70	69	61	62	100	80	40
main3	uw	4	2021-04-20	2021-04-22	13:58:00	14:48:00	timelapse 5	48h50min	2930	62	61	69	70	100	80	40
main3	uw	3	2021-04-20	2021-04-21	13:58:00	22:25:00	timelapse 5	32h 27min	1947	68	67	64	63	100	80	40
main3	uw	5	2021-04-20	2021-04-22	13:58:00	14:14:00	timelapse 5	48h 16min	2896	64	63	67	68	100	80	40

## Sheet: Picture analysis
name	date	cam	reef1	shelter_id	day	time_start	t	count	sighting	action	image	Visit	VisitID
main1	2021-04-13	5	69		0	12:50:00	24	1	Queen triggerfish	1	G0020239	1	0.1
main1	2021-04-13	2	61		0	12:50:00	24	1	Queen triggerfish	1	G0018958	1	0.1
main1	2021-04-13	2	68		0	12:50:00	24	1	Queen triggerfish	2	G0018959	1	0.1
main1	2021-04-13	2	68	t_r	0	12:50:00	24	1	Queen triggerfish	4	G0018960	1	0.1
main1	2021-04-13	2	68		0	12:50:00	24	1	Queen triggerfish	2	G0018961	1	0.1
main1	2021-04-13	2	67		0	12:50:00	24	1	Queen triggerfish	2	G0018963	1	0.1
main1	2021-04-13	2	67		0	12:50:00	24	1	Queen triggerfish	2	G0018964	1	0.1
main1	2021-04-13	2	67	b_l	0	12:50:00	24	1	Queen triggerfish	3	G0018965	1	0.1
main1	2021-04-13	2	68	t_r	0	12:50:00	24	1	Queen triggerfish	4	G0018967	1	0.1
main1	2021-04-13	2	68		0	12:50:00	24	1	Queen triggerfish	2	G0018968	1	0.1
main1	2021-04-13	2	68	t_r	0	12:51:00	25	1	Queen triggerfish	3	G0018969	1	0.1
main1	2021-04-13	2	68		0	12:51:00	25	1	Queen triggerfish	2	G0018971	1	0.1
main1	2021-04-13	2	68	t_l	0	12:51:00	25	1	Queen triggerfish	4	G0018972	1	0.1
main1	2021-04-13	2	68	t_l	0	12:51:00	25	1	Queen triggerfish	4	G0018973	1	0.1
main1	2021-04-13	2	68	t_r	0	12:51:00	25	1	Queen triggerfish	3	G0018974	1	0.1
main1	2021-04-13	2	68	b_r	0	12:51:00	25	1	Queen triggerfish	4	G0018976	1	0.1
main1	2021-04-13	2	68		0	12:51:00	25	1	Queen triggerfish	2		1	0.1
main1	2021-04-13	2	68	t_r	0	12:52:00	26	1	Queen triggerfish	4	G0018980	1	0.1
main1	2021-04-13	2	68		0	12:52:00	26	1	Queen triggerfish	2		1	0.1
main1	2021-04-13	2	68	t_r	0	12:52:00	26	1	Queen triggerfish	4		1	0.1
main1	2021-04-13	2	68	t_r	0	12:52:00	26	1	Queen triggerfish	3		1	0.1
main1	2021-04-13	2	68		0	12:52:00	26	1	Queen triggerfish	2		1	0.1
main1	2021-04-13	2	68	t_r	0	12:52:00	26	1	Queen triggerfish	3		1	0.1
main1	2021-04-13	2	68	t_r	0	12:52:00	26	1	Queen triggerfish	4		1	0.1
main1	2021-04-13	2	68	t_r	0	12:52:00	26	1	Queen triggerfish	4		1	0.1
main1	2021-04-13	2	68		0	12:52:00	26	1	Queen triggerfish	2		1	0.1
main1	2021-04-13	2	68	t_r	0	12:52:00	26	1	Queen triggerfish	4		1	0.1
main1	2021-04-13	2	68		0	12:52:00	26	1	Queen triggerfish	2		1	0.1
main1	2021-04-13	2	68	t_r	0	12:52:00	26	1	Queen triggerfish	4		1	0.1
main1	2021-04-13	2	68		0	12:52:00	26	1	Queen triggerfish	2		1	0.1
main1	2021-04-13	2	68	t_r	0	12:52:00	26	1	Queen triggerfish	4		1	0.1
main1	2021-04-13	2	68		0	12:52:00	26	1	Queen triggerfish	2		1	0.1
main1	2021-04-13	2	68	t_r	0	12:52:00	26	1	Queen triggerfish	4		1	0.1
main1	2021-04-13	2	68		0	12:52:00	26	1	Queen triggerfish	2		1	0.1
main1	2021-04-13	2	68	t_r	0	12:52:00	26	1	Queen triggerfish	4		1	0.1
main1	2021-04-13	2	68		0	12:52:00	26	1	Queen triggerfish	2		1	0.1
main1	2021-04-13	2	68	t_r	0	12:52:00	26	1	Queen triggerfish	4		1	0.1
main1	2021-04-13	2	68		0	12:52:00	26	1	Queen triggerfish	2		1	0.1
main1	2021-04-13	2	68	t_r	0	12:52:00	26	1	Queen triggerfish	4		1	0.1
main1	2021-04-13	2	68		0	12:52:00	26	1	Queen triggerfish	2		1	0.1
main1	2021-04-13	2	68	t_r	0	12:52:00	26	1	Queen triggerfish	4		1	0.1
main1	2021-04-13	2	68		0	12:52:00	26	1	Queen triggerfish	2		1	0.1
main1	2021-04-13	2	68	t_r	0	12:52:00	26	1	Queen triggerfish	4		1	0.1
main1	2021-04-13	2	68		0	12:52:00	26	1	Queen triggerfish	2		1	0.1
main1	2021-04-13	2	68	t_r	0	12:52:00	26	1	Queen triggerfish	4		1	0.1
main1	2021-04-13	2	68	b_r	0	12:55:00	29	1	Queen triggerfish	4	G0019020	1	0.1
main1	2021-04-13	2	68		0	12:55:00	29	1	Queen triggerfish	2		1	0.1
main1	2021-04-13	2	68	t_l	0	12:55:00	29	1	Queen triggerfish	4	G0019023	1	0.1
main1	2021-04-13	2	68		0	12:55:00	29	1	Queen triggerfish	2		1	0.1
main1	2021-04-13	2	68	t_r	0	12:55:00	29	1	Queen triggerfish	4	G0019026	1	0.1
main1	2021-04-13	2	68		0	12:55:00	29	1	Queen triggerfish	2		1	0.1
main1	2021-04-13	2	68	t_r	0	12:55:00	29	1	Queen triggerfish	4		1	0.1
main1	2021-04-13	2	68		0	12:55:00	29	1	Queen triggerfish	2		1	0.1
main1	2021-04-13	2	68	t_r	0	12:55:00	29	1	Queen triggerfish	4		1	0.1
main1	2021-04-13	2	68		0	12:56:00	30	1	Queen triggerfish	2		1	0.1
main1	2021-04-13	2	68	t_r	0	12:56:00	30	1	Queen triggerfish	4		1	0.1
main1	2021-04-13	2	68		0	12:56:00	30	1	Queen triggerfish	2		1	0.1
main1	2021-04-13	2	67		0	12:56:00	30	1	Queen triggerfish	2		1	0.1
main1	2021-04-13	2	68	b_r	0	12:56:00	30	1	Queen triggerfish	4	G0019038	1	0.1
main1	2021-04-13	2	68		0	12:56:00	30	1	Queen triggerfish	2		1	0.1
main1	2021-04-13	3	70	b_l	0	12:57:00	31	1	Queen triggerfish	4	G0013949	1	0.1
main1	2021-04-13	2	68	t_l	0	12:57:00	31	1	Queen triggerfish	4	G0019040	1	0.1
main1	2021-04-13	2	68		0	12:57:00	31	1	Queen triggerfish	2		1	0.1
main1	2021-04-13	2	68	t_r	0	12:57:00	31	1	Queen triggerfish	4	G0019044	1	0.1
main1	2021-04-13	2	68		0	12:57:00	31	1	Queen triggerfish	1	G0019045	1	0.1
main1	2021-04-13	2	68	b_r	0	12:57:00	31	1	Queen triggerfish	4	G0019046	1	0.1
main1	2021-04-13	2	68	b_l	0	12:57:00	31	1	Queen triggerfish	4	G0019047	1	0.1
main1	2021-04-13	2	68	b_l	0	12:57:00	31	1	Queen triggerfish	3		1	0.1
main1	2021-04-13	2	68		0	12:57:00	31	1	Queen triggerfish	2	G0019049	1	0.1
main1	2021-04-13	3	70	t_l	0	12:58:00	32	1	Queen triggerfish	4	G0013953	1	0.1
main1	2021-04-13	3	70		0	12:58:00	32	1	Queen triggerfish	2		1	0.1
main1	2021-04-13	3	70	t_l	0	12:58:00	32	1	Queen triggerfish	4		1	0.1
main1	2021-04-13	3	70		0	12:58:00	32	1	Queen triggerfish	2		1	0.1
main1	2021-04-13	3	70		0	12:58:00	32	1	Queen triggerfish	1	G0013968	1	0.1
main1	2021-04-13	4	62		0	12:59:00	33	1	Queen triggerfish	2	G0020516	1	0.1
main1	2021-04-13	4	62		0	12:59:00	33	1	Queen triggerfish	1	G0020518	1	0.1
main1	2021-04-13	3	70	b_l	0	12:59:00	33	1	Queen triggerfish	4		1	0.1
main1	2021-04-13	3	70		0	12:59:00	33	1	Queen triggerfish	2		1	0.1
main1	2021-04-13	3	69	b_l	0	13:00:00	34	1	Queen triggerfish	3	G0013973	1	0.1
main1	2021-04-13	3	69	b_l	0	13:00:00	34	1	Queen triggerfish	4	G0013974	1	0.1
main1	2021-04-13	3	69		0	13:00:00	34	1	Queen triggerfish	2		1	0.1
main1	2021-04-13	3	70		0	13:00:00	34	1	Queen triggerfish	2	G0013976	1	0.1
main1	2021-04-13	3	70	b_l	0	13:00:00	34	1	Queen triggerfish	4	G0013979	1	0.1
main1	2021-04-13	3	70	t_l	0	13:00:00	34	1	Queen triggerfish	4	G0013980	1	0.1
main1	2021-04-13	3	70		0	13:00:00	34	2	Queen triggerfish	2		1	0.1
main1	2021-04-13	3	70	t_l	0	13:01:00	35	1	Queen triggerfish	4		1	0.1
main1	2021-04-13	3	70		0	13:01:00	35	1	Queen triggerfish	2		1	0.1
main1	2021-04-13	3	70	t_l	0	13:01:00	35	1	Queen triggerfish	4		1	0.1
main1	2021-04-13	3	70		0	13:01:00	35	1	Queen triggerfish	2		1	0.1
main1	2021-04-13	3	70	b_r	0	13:02:00	36	1	Queen triggerfish	4	G0013998	1	0.1
main1	2021-04-13	3	70		0	13:02:00	36	1	Queen triggerfish	2		1	0.1
main1	2021-04-13	3	70	t_l	0	13:02:00	36	1	Queen triggerfish	4	G0014001	1	0.1
main1	2021-04-13	3	70		0	13:02:00	36	1	Queen triggerfish	2		1	0.1
main1	2021-04-13	3	70		0	13:02:00	36	1	Queen triggerfish	4		1	0.1
main1	2021-04-13	3	70		0	13:02:00	36	1	Queen triggerfish	2		1	0.1
main1	2021-04-13	3	70	t_r	0	13:02:00	36	1	Queen triggerfish	4	G0014007	1	0.1
main1	2021-04-13	3	70	t_l	0	13:03:00	37	1	Queen triggerfish	4	G0014009	1	0.1
main1	2021-04-13	3	69		0	13:03:00	37	1	Queen triggerfish	2	G0014011	1	0.1
main1	2021-04-13	3	70	b_l	0	13:03:00	37	1	Queen triggerfish	4	G0014014	1	0.1
main1	2021-04-13	3	70		0	13:03:00	37	1	Queen triggerfish	2		1	0.1
main1	2021-04-13	3	70	b_l	0	13:03:00	37	1	Queen triggerfish	4	G0014018	1	0.1
main1	2021-04-13	4	62		0	13:04:00	38	1	Queen triggerfish	2	G0020572	1	0.1
main1	2021-04-13	4	62	b_r	0	13:04:00	38	1	Queen triggerfish	4		1	0.1
main1	2021-04-13	4	62		0	13:04:00	38	1	Queen triggerfish	2		1	0.1
main1	2021-04-13	4	62	b_r	0	13:04:00	38	1	Queen triggerfish	4		1	0.1
main1	2021-04-13	4	62		0	13:04:00	38	1	Queen triggerfish	2		1	0.1
main1	2021-04-13	4	61	b_l	0	13:04:00	38	1	Queen triggerfish	4	G0020581	1	0.1
main1	2021-04-13	4	61		0	13:04:00	38	1	Queen triggerfish	2		1	0.1
main1	2021-04-13	3	70		0	13:04:00	38	1	Queen triggerfish	1	G0014031	1	0.1
main1	2021-04-13	4	61	b_l	0	13:05:00	39	1	Queen triggerfish	4		1	0.1
main1	2021-04-13	4	61	b_l	0	13:05:00	39	1	Queen triggerfish	3		1	0.1
main1	2021-04-13	4	61		0	13:05:00	39	1	Queen triggerfish	2		1	0.1
main1	2021-04-13	4	62	t_r	0	13:05:00	39	1	Queen triggerfish	4	G0020586	1	0.1
main1	2021-04-13	4	62		0	13:05:00	39	1	Queen triggerfish	2		1	0.1
main1	2021-04-13	4	61	t_l	0	13:05:00	39	1	Queen triggerfish	4	G0020588	1	0.1
main1	2021-04-13	4	61		0	13:05:00	39	1	Queen triggerfish	2		1	0.1
main1	2021-04-13	4	61	t_l	0	13:05:00	39	1	Queen triggerfish	4		1	0.1
main1	2021-04-13	4	61		0	13:05:00	39	1	Queen triggerfish	2		1	0.1
main1	2021-04-13	4	61	b_r	0	13:06:00	40	1	Queen triggerfish	3		1	0.1
main1	2021-04-13	4	61		0	13:06:00	40	1	Queen triggerfish	2		1	0.1
main1	2021-04-13	4	61		0	13:06:00	40	1	Queen triggerfish	1	G0020597	1	0.1
main1	2021-04-13	5	63		0	13:06:00	40	1	Queen triggerfish	2	G0020432	1	0.1
main1	2021-04-13	5	64		0	13:06:00	40	1	Queen triggerfish	2	G0020433	1	0.1
main1	2021-04-13	5	63	b_l	0	13:06:00	40	1	Queen triggerfish	4	G0020435	1	0.1
main1	2021-04-13	5	63	b_r	0	13:06:00	40	1	Queen triggerfish	4	G0020438	1	0.1
main1	2021-04-13	4	61	t_r	0	13:07:00	41	1	Queen triggerfish	3	G0020607	1	0.1
main1	2021-04-13	4	61	t_r	0	13:07:00	41	1	Queen triggerfish	4	G0020608	1	0.1
main1	2021-04-13	4	61		0	13:07:00	41	1	Queen triggerfish	2	G0020609	1	0.1
main1	2021-04-13	3	69	b_r	0	13:07:00	41	1	Queen triggerfish	4		1	0.1
main1	2021-04-13	3	70	b_r	0	13:08:00	42	1	Queen triggerfish	3	G0014069	1	0.1
main1	2021-04-13	3	69		0	13:08:00	42	1	Queen triggerfish	2	G0014073	1	0.1
main1	2021-04-13	3	70		0	13:08:00	42	1	Queen triggerfish	2	G0014080	1	0.1
main1	2021-04-13	3	70	b_l	0	13:08:00	42	1	Queen triggerfish	3	G0014080	1	0.1
main1	2021-04-13	5	63		0	13:08:00	42	1	Queen triggerfish	1	G0020459	1	0.1
main1	2021-04-13	2	68		0	13:08:00	42	1	Queen triggerfish	1	G0019177	1	0.1
main1	2021-04-13	2	68	t_r	0	13:08:00	42	1	Queen triggerfish	3	G0019180	1	0.1
main1	2021-04-13	2	68	t_r	0	13:08:00	42	1	Queen triggerfish	3	G0019181	1	0.1
main1	2021-04-13	4	61	b_r	0	13:09:00	43	1	Queen triggerfish	3	G0020632	1	0.1
main1	2021-04-13	4	62		0	13:09:00	43	1	Queen triggerfish	2		1	0.1
main1	2021-04-13	4	62	b_r	0	13:09:00	43	1	Queen triggerfish	4		1	0.1
main1	2021-04-13	4	61		0	13:09:00	43	1	Queen triggerfish	2		1	0.1
main1	2021-04-13	4	61		0	13:09:00	43	1	Queen triggerfish	1		1	0.1
main1	2021-04-13	3	69	t_r	0	13:09:00	43	1	Queen triggerfish	4	G0014089	1	0.1
main1	2021-04-13	3	69		0	13:09:00	43	1	Queen triggerfish	2		1	0.1
main1	2021-04-13	3	70		0	13:09:00	43	1	Queen triggerfish	2		1	0.1
main1	2021-04-13	3	70	t_l	0	13:09:00	43	1	Queen triggerfish	4		1	0.1
main1	2021-04-13	3	70		0	13:10:00	44	1	Queen triggerfish	2		1	0.1
main1	2021-04-13	3	70	t_l	0	13:10:00	44	1	Queen triggerfish	4		1	0.1
main1	2021-04-13	3	70		0	13:10:00	44	1	Queen triggerfish	2		1	0.1
main1	2021-04-13	3	70	b_r	0	13:10:00	44	1	Queen triggerfish	4	G0014098	1	0.1
main1	2021-04-13	3	70		0	13:10:00	44	1	Queen triggerfish	2		1	0.1
main1	2021-04-13	3	70	b_r	0	13:10:00	44	1	Queen triggerfish	4		1	0.1
main1	2021-04-13	4	62	b_r	0	13:11:00	45	1	Queen triggerfish	3	G0020658	1	0.1
main1	2021-04-13	4	62	b_r	0	13:11:00	45	1	Queen triggerfish	4		1	0.1
main1	2021-04-13	4	62		0	13:11:00	45	1	Queen triggerfish	2		1	0.1
main1	2021-04-13	4	61	b_r	0	13:11:00	45	1	Queen triggerfish	4	G0020662	1	0.1
main1	2021-04-13	4	61		0	13:11:00	45	1	Queen triggerfish	2		1	0.1
main1	2021-04-13	4	61		0	13:11:00	45	1	Queen triggerfish	1		1	0.1
main1	2021-04-13	3	70	t_l	0	13:11:00	45	1	Queen triggerfish	4	G0014106	1	0.1
main1	2021-04-13	3	70		0	13:11:00	45	1	Queen triggerfish	2		1	0.1
main1	2021-04-13	3	70	t_l	0	13:11:00	45	1	Queen triggerfish	4	G0014116	1	0.1
main1	2021-04-13	4	61		0	13:12:00	46	1	Queen triggerfish	2	G0020673	1	0.1
main1	2021-04-13	4	62	t_r	0	13:12:00	46	1	Queen triggerfish	3		1	0.1
main1	2021-04-13	4	62		0	13:12:00	46	1	Queen triggerfish	1		1	0.1
main1	2021-04-13	3	70	b_r	0	13:12:00	46	1	Queen triggerfish	4	G0014119	1	0.1
main1	2021-04-13	5	64		0	13:12:00	46	1	Queen triggerfish	2	G0020510	1	0.1
main1	2021-04-13	5	64	t_r	0	13:12:00	46	1	Queen triggerfish	3	G0020511	1	0.1
main1	2021-04-13	5	64	t_r	0	13:12:00	46	1	Queen triggerfish	4	G0020512	1	0.1
main1	2021-04-13	3	70	b_l	0	13:13:00	47	1	Queen triggerfish	4	G0014133	1	0.1
main1	2021-04-13	3	70	t_l	0	13:13:00	47	1	Queen triggerfish	4	G0014138	1	0.1
main1	2021-04-13	4	62		0	13:14:00	48	1	Queen triggerfish	2	G0020693	1	0.1
main1	2021-04-13	4	62		0	13:14:00	48	1	Queen triggerfish	1		1	0.1
main1	2021-04-13	3	70	t_r	0	13:14:00	48	1	Queen triggerfish	4	G0014141	1	0.1
main1	2021-04-13	3	69		0	13:14:00	48	1	Queen triggerfish	2	G0014146	1	0.1
main1	2021-04-13	3	69	b_r	0	13:14:00	48	1	Queen triggerfish	3	G0014147	1	0.1
main1	2021-04-13	3	70		0	13:14:00	48	1	Queen triggerfish	2	G0014148	1	0.1
main1	2021-04-13	3	70	t_l	0	13:15:00	49	1	Queen triggerfish	3	G0014159	1	0.1
main1	2021-04-13	3	70	t_l	0	13:15:00	49	1	Queen triggerfish	4	G0014160	1	0.1
main1	2021-04-13	3	70		0	13:15:00	49	1	Queen triggerfish	2		1	0.1
main1	2021-04-13	4	61		0	13:17:00	51	1	Queen triggerfish	2	G0020728	1	0.1
main1	2021-04-13	4	61		0	13:17:00	51	1	Queen triggerfish	1		1	0.1
main1	2021-04-13	5	63		0	13:17:00	51	1	Queen triggerfish	2	G0020568	1	0.1
main1	2021-04-13	5	63	b_r	0	13:17:00	51	1	Queen triggerfish	4	G0020572	1	0.1
main1	2021-04-13	2	68		0	13:17:00	51	1	Queen triggerfish	1	G0019286	1	0.1
main1	2021-04-13	3	70		0	13:18:00	52	1	Queen triggerfish	2	G0014196	1	0.1
main1	2021-04-13	5	63		0	13:18:00	52	1	Queen triggerfish	2	G0020577	1	0.1
main1	2021-04-13	4	62		0	13:19:00	53	1	Queen triggerfish	2	G0020754	1	0.1
main1	2021-04-13	4	62		0	13:19:00	53	1	Queen triggerfish	1		1	0.1
main1	2021-04-13	5	64		0	13:19:00	53	1	Queen triggerfish	2	G0020591	1	0.1
main1	2021-04-13	2	68		0	13:20:00	54	1	Queen triggerfish	2	G0019321	1	0.1
main1	2021-04-13	2	68	t_r	0	13:20:00	54	1	Queen triggerfish	4	G0019322	1	0.1
main1	2021-04-13	2	68		0	13:20:00	54	1	Queen triggerfish	2	G0019324	1	0.1
main1	2021-04-13	2	68		0	13:20:00	54	1	Queen triggerfish	2	G0019325	1	0.1
main1	2021-04-13	2	68	b_r	0	13:20:00	54	1	Queen triggerfish	4	G0019326	1	0.1
main1	2021-04-13	2	68	b_l	0	13:20:00	54	1	Queen triggerfish	4	G0019328	1	0.1
main1	2021-04-13	2	68		0	13:20:00	54	1	Queen triggerfish	2	G0019329	1	0.1
main1	2021-04-13	5	63		0	13:21:00	55	1	Queen triggerfish	2	G0020618	1	0.1
main1	2021-04-13	2	68		0	13:21:00	55	1	Queen triggerfish	1	G0019338	1	0.1
main1	2021-04-13	2	67	t_r	0	13:22:00	56	1	Queen triggerfish	4	G0019339	1	0.1
main1	2021-04-13	2	67		0	13:22:00	56	1	Queen triggerfish	2	G0019345	1	0.1
main1	2021-04-13	2	67		0	13:22:00	56	1	Queen triggerfish	2	G0019346	1	0.1
main1	2021-04-13	2	67	b_r	0	13:22:00	56	1	Queen triggerfish	4	G0019348	1	0.1
main1	2021-04-13	5	63		0	13:23:00	57	1	Queen triggerfish	2	G0020637	1	0.1
main1	2021-04-13	5	64		0	13:23:00	57	1	Queen triggerfish	2	G0020639	1	0.1
main1	2021-04-13	2	67		0	13:23:00	57	1	Queen triggerfish	2	G0019352	1	0.1
main1	2021-04-13	2	67	b_r	0	13:23:00	57	1	Queen triggerfish	4	G0019353	1	0.1
main1	2021-04-13	2	67		0	13:23:00	57	1	Queen triggerfish	2	G0019354	1	0.1
main1	2021-04-13	5	64	t_l	0	13:24:00	58	1	Queen triggerfish	4	G0020645	1	0.1
main1	2021-04-13	5	64		0	13:24:00	58	1	Queen triggerfish	2		1	0.1
main1	2021-04-13	5	64	t_l	0	13:24:00	58	1	Queen triggerfish	4		1	0.1
main1	2021-04-13	5	64		0	13:24:00	58	1	Queen triggerfish	2		1	0.1
main1	2021-04-13	5	64	t_l	0	13:24:00	58	1	Queen triggerfish	4		1	0.1
main1	2021-04-13	5	64		0	13:24:00	58	1	Queen triggerfish	2		1	0.1
main1	2021-04-13	5	64	b_l	0	13:24:00	58	1	Queen triggerfish	4	G0020650	1	0.1
main1	2021-04-13	5	64		0	13:24:00	58	1	Queen triggerfish	2		1	0.1
main1	2021-04-13	5	64		0	13:24:00	58	1	Queen triggerfish	3		1	0.1
main1	2021-04-13	5	64	b_r	0	13:25:00	59	1	Queen triggerfish	4	G0020660	1	0.1
main1	2021-04-13	5	64		0	13:25:00	59	1	Queen triggerfish	2		1	0.1
main1	2021-04-13	5	64		0	13:25:00	59	1	Queen triggerfish	1		1	0.1
main1	2021-04-13	2	67		0	13:25:00	59	1	Queen triggerfish	1	G0019384	1	0.1
main1	2021-04-13	2	68	b_r	0	13:25:00	59	1	Queen triggerfish	4	G0019385	1	0.1
main1	2021-04-13	2	68		0	13:25:00	59	1	Queen triggerfish	1	G0019386	1	0.1
main1	2021-04-13	5	64	b_l	0	13:26:00	60	1	Queen triggerfish	4	G0020669	1	0.1
main1	2021-04-13	5	64		0	13:26:00	60	1	Queen triggerfish	2		1	0.1
main1	2021-04-13	5	64	b_l	0	13:26:00	60	1	Queen triggerfish	4		1	0.1
main1	2021-04-13	5	64		0	13:26:00	60	1	Queen triggerfish	2		1	0.1
main1	2021-04-13	5	64	b_l	0	13:26:00	60	1	Queen triggerfish	4		1	0.1
main1	2021-04-13	5	64		0	13:26:00	60	1	Queen triggerfish	2		1	0.1
main1	2021-04-13	5	64	b_l	0	13:26:00	60	1	Queen triggerfish	4		1	0.1
main1	2021-04-13	5	64	t_l	0	13:27:00	61	1	Queen triggerfish	4	G0020687	1	0.1
main1	2021-04-13	5	64		0	13:28:00	62	1	Queen triggerfish	1	G0020697	1	0.1
main1	2021-04-13	5	64		0	13:28:00	62	1	Queen triggerfish	2	G0020700	1	0.1
main1	2021-04-13	2	68		0	13:28:00	62	1	Queen triggerfish	1	G0019416	1	0.1
main1	2021-04-13	2	67		0	13:29:00	63	1	Queen triggerfish	2	G0019433	1	0.1
main1	2021-04-13	2	67	t_r	0	13:29:00	63	1	Queen triggerfish	4	G0019434	1	0.1
main1	2021-04-13	2	67		0	13:29:00	63	1	Queen triggerfish	1	G0019435	1	0.1
main1	2021-04-13	5	64		0	13:30:00	64	1	Queen triggerfish	2	G0020728	1	0.1
main1	2021-04-13	5	64		0	13:33:00	67	1	Queen triggerfish	1	G0020759	1	0.1
main1	2021-04-13	3	70		0	13:38:00	72	1	Queen triggerfish	1	G0014431	1	0.1
main1	2021-04-13	5	64		0	13:38:00	72	1	Queen triggerfish	1	G0020817	1	0.1
main1	2021-04-13	2	67		0	13:38:00	72	1	Queen triggerfish	1	G0019535	1	0.1
main1	2021-04-13	2	67		0	13:38:00	72	1	Queen triggerfish	1	G0019540	1	0.1
main1	2021-04-13	2	68		0	13:38:00	72	1	Queen triggerfish	2	G0019541	1	0.1
main1	2021-04-13	3	70	t_l	0	13:39:00	73	1	Queen triggerfish	4	G0014446	1	0.1
main1	2021-04-13	3	70		0	13:39:00	73	1	Queen triggerfish	2		1	0.1
main1	2021-04-13	3	70	t_l	0	13:39:00	73	1	Queen triggerfish	4	G0014448	1	0.1
main1	2021-04-13	3	70		0	13:39:00	73	1	Queen triggerfish	2		1	0.1
main1	2021-04-13	4	62		0	13:40:00	74	1	Queen triggerfish	2	G0021007	1	0.1
main1	2021-04-13	4	62	b_r	0	13:40:00	74	1	Queen triggerfish	4		1	0.1
main1	2021-04-13	4	62		0	13:41:00	75	1	Queen triggerfish	2		1	0.1
main1	2021-04-13	4	62	b_r	0	13:41:00	75	1	Queen triggerfish	4		1	0.1
main1	2021-04-13	4	62		0	13:41:00	75	1	Queen triggerfish	2		1	0.1
main1	2021-04-13	4	61	b_r	0	13:41:00	75	1	Queen triggerfish	4		1	0.1
main1	2021-04-13	4	61		0	13:41:00	75	1	Queen triggerfish	2		1	0.1
main1	2021-04-13	5	64		0	13:41:00	75	1	Queen triggerfish	3	G0020854	1	0.1
main1	2021-04-13	5	64		0	13:41:00	75	1	Queen triggerfish	2		1	0.1
main1	2021-04-13	5	64		0	13:41:00	75	1	Queen triggerfish	3		1	0.1
main1	2021-04-13	5	64	b_l	0	13:41:00	75	1	Queen triggerfish	4		1	0.1
main1	2021-04-13	5	64	t_l	0	13:42:00	76	1	Queen triggerfish	4	G0020863	1	0.1
main1	2021-04-13	5	64		0	13:42:00	76	1	Queen triggerfish	2		1	0.1
main1	2021-04-13	5	64	b_l	0	13:42:00	76	1	Queen triggerfish	4	G0020869	1	0.1
main1	2021-04-13	5	64		0	13:42:00	76	1	Queen triggerfish	2		1	0.1
main1	2021-04-13	5	64		0	13:43:00	77	1	Queen triggerfish	2	G0020876	1	0.1
main1	2021-04-13	5	64	t_r	0	13:43:00	77	1	Queen triggerfish	4		1	0.1
main1	2021-04-13	5	64		0	13:43:00	77	1	Queen triggerfish	2		1	0.1
main1	2021-04-13	5	64	b_l	0	13:43:00	77	1	Queen triggerfish	4	G0020879	1	0.1
main1	2021-04-13	5	64		0	13:43:00	77	1	Queen triggerfish	2		1	0.1
main1	2021-04-13	5	64		0	13:43:00	77	1	Queen triggerfish	1		1	0.1
main1	2021-04-13	2	67		0	13:43:00	77	1	Queen triggerfish	2	G0019601	1	0.1
main1	2021-04-13	5	64		0	13:44:00	78	1	Queen triggerfish	1	G0020895	1	0.1
main1	2021-04-13	2	68		0	13:44:00	78	1	Queen triggerfish	2	G0019607	1	0.1
main1	2021-04-13	2	68		0	13:44:00	78	1	Queen triggerfish	2	G0019608	1	0.1
main1	2021-04-13	2	67		0	13:44:00	78	1	Queen triggerfish	2	G0019609	1	0.1
main1	2021-04-13	2	67		0	13:44:00	78	1	Queen triggerfish	2	G0019610	1	0.1
main1	2021-04-13	2	67		0	13:44:00	78	1	Queen triggerfish	2	G0019611	1	0.1
main1	2021-04-13	2	67	t_l	0	13:44:00	78	1	Queen triggerfish	3	G0019612	1	0.1
main1	2021-04-13	2	67		0	13:44:00	78	1	Queen triggerfish	2	G0019613	1	0.1
main1	2021-04-13	2	67		0	13:44:00	78	1	Queen triggerfish	2	G0019614	1	0.1
main1	2021-04-13	2	67		0	13:44:00	78	1	Queen triggerfish	2	G0019615	1	0.1
main1	2021-04-13	4	61		0	13:45:00	79	1	Queen triggerfish	1	G0021067	1	0.1
main1	2021-04-13	2	67		0	13:45:00	79	1	Queen triggerfish	1	G0019616	1	0.1
main1	2021-04-13	2	67		0	13:45:00	79	1	Queen triggerfish	1	G0019617	1	0.1
main1	2021-04-13	5	64	t_r	0	13:46:00	80	1	Queen triggerfish	4	G0020909	1	0.1
main1	2021-04-13	2	67		0	13:58:00	92	1	Queen triggerfish	1	G0019780	2	0.2
main1	2021-04-13	2	68	t_r	0	13:58:00	92	1	Queen triggerfish	4	G0019781	2	0.2
main1	2021-04-13	2	68		0	13:58:00	92	1	Queen triggerfish	2	G0019783	2	0.2
main1	2021-04-13	2	68		0	13:59:00	93	1	Queen triggerfish	2	G0019784	2	0.2
main1	2021-04-13	2	68		0	13:59:00	93	1	Queen triggerfish	2	G0019785	2	0.2
main1	2021-04-13	2	68		0	13:59:00	93	1	Queen triggerfish	2	G0019786	2	0.2
main1	2021-04-13	2	68		0	13:59:00	93	1	Queen triggerfish	2	G0019787	2	0.2
main1	2021-04-13	2	68		0	13:59:00	93	1	Queen triggerfish	1	G0019788	2	0.2
main1	2021-04-13	2	67	b_l	0	14:00:00	94	1	Queen triggerfish	3	G0019804	2	0.2
main1	2021-04-13	2	67		0	14:12:00	106	1	Queen triggerfish	1	G0019950	3	0.3
main1	2021-04-13	3	70		0	14:13:00	107	1	Queen triggerfish	2	G0014855	3	0.3
main1	2021-04-13	2	67		0	14:13:00	107	1	Queen triggerfish	1	G0019953	3	0.3
main1	2021-04-13	4	61		0	14:22:00	116	1	Queen triggerfish	1	G0021517	3	0.3
main1	2021-04-13	2	67		0	14:22:00	116	1	Queen triggerfish	1	G0020072	3	0.3
main1	2021-04-13	2	68		0	14:23:00	117	1	Queen triggerfish	2	G0020073	3	0.3
main1	2021-04-13	4	61		0	14:28:00	122	2	Queen triggerfish	1	G0021582	3	0.3
main1	2021-04-13	3	70		0	14:28:00	122	1	Queen triggerfish	1	G0015030	3	0.3
main1	2021-04-13	5	64		0	14:29:00	123	1	Queen triggerfish	1	G0021435	3	0.3
main1	2021-04-13	5	64		0	14:29:00	123	1	Queen triggerfish	2	G0021436	3	0.3
main1	2021-04-13	3	69		0	14:51:00	145	1	Queen triggerfish	2	G0015310	4	0.4
main1	2021-04-13	2	68		0	14:51:00	145	1	Queen triggerfish	1	G0020411	4	0.4
main1	2021-04-13	2	68		0	14:51:00	145	1	Queen triggerfish	2	G0020412	4	0.4
main1	2021-04-13	2	67	t_l	0	14:54:00	148	1	Queen triggerfish	4	G0020448	4	0.4
main1	2021-04-13	2	67		0	14:54:00	148	1	Queen triggerfish	2	G0020450	4	0.4
main1	2021-04-13	2	67	t_l	0	14:54:00	148	1	Queen triggerfish	4	G0020451	4	0.4
main1	2021-04-13	3	70		0	14:55:00	149	1	Queen triggerfish	2		4	0.4
main1	2021-04-13	3	70	b_r	0	14:55:00	149	1	Queen triggerfish	4	G0015362	4	0.4
main1	2021-04-13	3	70		0	14:55:00	149	1	Queen triggerfish	2		4	0.4
main1	2021-04-13	2	67		0	14:55:00	149	1	Queen triggerfish	2	G0020457	4	0.4
main1	2021-04-13	2	68		0	14:55:00	149	1	Queen triggerfish	2	G0020462	4	0.4
main1	2021-04-13	4	61		0	15:13:00	167	1	Queen triggerfish	1	G0022121	5	0.5
main1	2021-04-13	2	68		0	15:13:00	167	1	Queen triggerfish	2	G0020676	5	0.5
main1	2021-04-13	2	68	t_m	0	15:13:00	167	1	Queen triggerfish	3	G0020680	5	0.5
main1	2021-04-13	3	70		0	15:15:00	169	1	Queen triggerfish	2	G0015595	5	0.5
main1	2021-04-13	3	70	t_l	0	15:16:00	170	1	Queen triggerfish	4	G0015602	5	0.5
main1	2021-04-13	3	70		0	15:16:00	170	1	Queen triggerfish	2		5	0.5
main1	2021-04-13	3	70	t_l	0	15:16:00	170	1	Queen triggerfish	4	G0015607	5	0.5
main1	2021-04-13	3	70		0	15:16:00	170	1	Queen triggerfish	2		5	0.5
main1	2021-04-13	3	70	b_l	0	15:16:00	170	1	Queen triggerfish	4	G0015613	5	0.5
main1	2021-04-13	5	64		0	15:16:00	170	1	Queen triggerfish	1	G0021999	5	0.5
main1	2021-04-13	3	70		0	15:17:00	171	1	Queen triggerfish	2		5	0.5
main1	2021-04-13	5	64		0	15:20:00	174	1	Queen triggerfish	2		5	0.5
main1	2021-04-13	5	64		0	15:20:00	174	1	Queen triggerfish	2		5	0.5
main1	2021-04-13	5	64	b_r	0	15:20:00	174	1	Queen triggerfish	4	G0022039	5	0.5
main1	2021-04-13	4	61		0	15:21:00	175	1	Queen triggerfish	1	G0022218	5	0.5
main1	2021-04-13	3	70		0	15:25:00	179	1	Queen triggerfish	2	G0015720	5	0.5
main1	2021-04-13	2	68		0	15:25:00	179	1	Queen triggerfish	1	G0020827	5	0.5
main1	2021-04-13	4	61		0	15:45:00	199	1	Queen triggerfish	1	G0022510	6	0.6
main1	2021-04-13	2	68		0	15:45:00	199	1	Queen triggerfish	1	G0021068	6	0.6
main1	2021-04-13	2	68		0	15:48:00	202	1	Queen triggerfish	1	G0021093	6	0.6
main1	2021-04-13	4	61		0	16:27:00	241	1	Queen triggerfish	2	G0023008	7	0.7
main1	2021-04-13	2	68		0	16:30:00	244	1	Queen triggerfish	1	G0021597	7	0.7
main1	2021-04-13	2	68		0	16:33:00	247	1	Queen triggerfish	1	G0021643	7	0.7
main1	2021-04-13	4	61		0	16:34:00	248	1	Queen triggerfish	1	G0023101	7	0.7
main1	2021-04-13	3	69		0	16:34:00	248	1	Queen triggerfish	2		7	0.7
main1	2021-04-13	3	69	t_r	0	16:34:00	248	1	Queen triggerfish	4	G0016544	7	0.7
main1	2021-04-13	3	69		0	16:34:00	248	1	Queen triggerfish	2		7	0.7
main1	2021-04-13	4	62		0	16:51:00	265	1	Queen triggerfish	2	G0023306	8	0.8
main1	2021-04-13	5	64		0	16:51:00	265	1	Queen triggerfish	1	G0023138	8	0.8
main1	2021-04-13	2	68		0	16:51:00	265	1	Queen triggerfish	1	G0021857	8	0.8
main1	2021-04-13	2	68		0	16:55:00	269	1	Queen triggerfish	1	G0021906	8	0.8
main1	2021-04-13	5	64		0	16:57:00	271	1	Queen triggerfish	1	G0023203	8	0.8
main1	2021-04-13	4	62		0	16:59:00	273	1	Queen triggerfish	1	G0023401	8	0.8
main1	2021-04-13	3	70		0	17:00:00	274	1	Queen triggerfish	2		8	0.8
main1	2021-04-13	3	70	t_l	0	17:00:00	274	1	Queen triggerfish	4		8	0.8
main1	2021-04-13	3	70		0	17:00:00	274	1	Queen triggerfish	2		8	0.8
main1	2021-04-13	5	64		0	17:00:00	274	1	Queen triggerfish	1	G0023243	8	0.8
main1	2021-04-13	2	68		0	17:00:00	274	1	Queen triggerfish	1	G0021963	8	0.8
main1	2021-04-13	2	67		0	17:00:00	274	1	Queen triggerfish	2	G0021964	8	0.8
main1	2021-04-13	4	62		0	17:03:00	277	1	Queen triggerfish	1	G0023446	8	0.8
main1	2021-04-13	4	62		0	17:28:00	302	1	Queen triggerfish	1	G0023741	9	0.9
main1	2021-04-13	2	67		0	17:31:00	305	1	Queen triggerfish	1	G0022335	9	0.9
main1	2021-04-13	2	67	t_r	0	17:31:00	305	1	Queen triggerfish	4	G0022336	9	0.9
main1	2021-04-13	3	70		0	17:39:00	313	1	Queen triggerfish	2	G0017326	9	0.9
main1	2021-04-13	2	67		0	17:43:00	317	1	Queen triggerfish	1	G0022482	9	0.9
main1	2021-04-13	4	62		0	17:44:00	318	1	Queen triggerfish	1	G0023931	9	0.9
main1	2021-04-13	2	67		0	18:10:00	344	1	Queen triggerfish	1	G0022801	10	0.10
main1	2021-04-13	2	67		0	18:21:00	355	1	Queen triggerfish	1	G0022929	11	0.11
main1	2021-04-13	3	69		0		38	1	Queen triggerfish	2
main1	2021-04-14	3	69		1	05:42:00	1036	1	Queen triggerfish	1		1	1.1
main1	2021-04-14	3	69		1	05:42:00	1036	1	Queen triggerfish	2		1	1.1
main1	2021-04-14	3	69	t_r	1	05:42:00	1036	1	Queen triggerfish	4	G0025999	1	1.1
main1	2021-04-14	3	69		1	05:42:00	1036	1	Queen triggerfish	2		1	1.1
main1	2021-04-14	2	68		1	05:56:00	1050	1	Queen triggerfish	2	G0031275	2	1.2
main1	2021-04-14	2	68	t_l	1	05:56:00	1050	1	Queen triggerfish	4	G0031276	2	1.2
main1	2021-04-14	2	68	t_l	1	05:56:00	1050	1	Queen triggerfish	3	G0031277	2	1.2
main1	2021-04-14	2	68		1	05:58:00	1052	1	Queen triggerfish	1	G0031303	2	1.2
main1	2021-04-14	3	69		1	06:02:00	1056	1	Queen triggerfish	1	G0026245	2	1.2
main1	2021-04-14	2	68		1	06:02:00	1056	1	Queen triggerfish	1	G0031350	2	1.2
main1	2021-04-14	5	64		1	06:03:00	1057	2	Queen triggerfish	1	G0032644	2	1.2
main1	2021-04-14	2	68		1	06:05:00	1059	1	Queen triggerfish	1	G0031379	2	1.2
main1	2021-04-14	3	70		1	06:15:00	1069	1	Queen triggerfish	2	G0026405	2	1.2
main1	2021-04-14	3	70		1	06:57:00	1111	1	Queen triggerfish	1	G0026908	3	1.3
main1	2021-04-14	3	70		1	07:15:00	1129	1	Queen triggerfish	2	G0027119	4	1.4
main1	2021-04-14	3	69		1	07:15:00	1129	1	Queen triggerfish	2	G0027120	4	1.4
main1	2021-04-14	2	68		1	07:15:00	1129	1	Queen triggerfish	2	G0032229	4	1.4
main1	2021-04-14	2	67		1	07:15:00	1129	1	Queen triggerfish	2	G0032230	4	1.4
main1	2021-04-14	2	67		1	08:04:00	1178	1	Caribbean spiny lobster	1	G0032818	5	1.5
main1	2021-04-14	3	69		1	08:08:00	1182	1	Queen triggerfish	1	G0027753	5	1.5
main1	2021-04-14	2	67		1	09:01:00	1235	1	Queen triggerfish	1	G0033497	6	1.6
main1	2021-04-14	2	67		1	11:46:00	1400	2	Porcupinefish	2	G0035476	7	1.7
main1	2021-04-14	2	67		1	11:46:00	1400	2	Porcupinefish	1	G0035477	7	1.7
main1	2021-04-14	5	64		1	11:47:00	1401	2	Porcupinefish	1	G0036763	7	1.7
main1	2021-04-14	2	68		1	13:02:00	1476	1	Queen triggerfish	2	G0036391	8	1.8
main1	2021-04-14	2	68	t_l	1	13:02:00	1476	1	Queen triggerfish	3	G0036392	8	1.8
main1	2021-04-14	2	68	t_l	1	13:02:00	1476	1	Queen triggerfish	4	G0036393	8	1.8
main1	2021-04-14	2	67		1	13:02:00	1476	1	Queen triggerfish	2	G0036394	8	1.8
main1	2021-04-14	2	67	b_l	1	13:03:00	1477	1	Queen triggerfish	3	G0036395	8	1.8
main1	2021-04-14	3	69		1	13:06:00	1480	1	Queen triggerfish	1	G0031334	8	1.8
main1	2021-04-14	5	64		1	13:12:00	1486	1	Porcupinefish	1	G0037790	8	1.8
main1	2021-04-14	2	67		1	13:12:00	1486	1	Porcupinefish	1	G0036510	8	1.8
main1	2021-04-14	2	68		1	13:12:00	1486	1	Porcupinefish	2	G0036511	8	1.8
main1	2021-04-14	2	68		1	13:20:00	1494	2	Porcupinefish	1	G0036609	9	1.9
main1	2021-04-14	5	64		1	13:22:00	1496	1	Porcupinefish	1	G0037913	9	1.9
main1	2021-04-14	3	70		1	13:28:00	1502	1	Queen triggerfish	2	G0031599	9	1.9
main1	2021-04-14	2	68		1	13:28:00	1502	1	Queen triggerfish	1	G0036700	9	1.9
main1	2021-04-14	5	64		1	13:44:00	1518	1	Queen triggerfish	1	G0039139	10	1.10
main2	2021-04-14	2	68		1	13:50:00	24	1	Queen triggerfish	2	G0018962	11	1.11
main1	2021-04-14	2	68		1	14:15:00	1549	1	Queen triggerfish	1	G0037267	12	1.12
main1	2021-04-14	2	67		1	14:49:00	1583	1	Queen triggerfish	2	G0037673	13	1.13
main1	2021-04-14	2	67		1	14:53:00	1587	1	Queen triggerfish	1	G0037719	13	1.13
main1	2021-04-14	2	67		1	15:00:00	1594	1	Porcupinefish	1	G0037810
main1	2021-04-14	2	67		1	15:32:00	1626	1	Queen triggerfish	1	G0038188	14	1.14
main1	2021-04-14	3	70		1	15:34:00	1628	1	Queen triggerfish	1	G0033108	14	1.14
main1	2021-04-14	2	68		1	15:34:00	1628	1	Queen triggerfish	2	G0038209	14	1.14
main1	2021-04-14	2	68		1	16:02:00	1656	1	Queen triggerfish	1	G0038551	15	1.15
main1	2021-04-14	2	68		1	16:14:00	1668	1	Queen triggerfish	1	G0038698	16	1.16
main1	2021-04-14	2	68		1	16:29:00	1683	1	Queen triggerfish	1	G0038875	17	1.17
main1	2021-04-14	2	68		1	16:32:00	1686	1	Queen triggerfish	1	G0038904	17	1.17
main1	2021-04-14	3	70		1	16:33:00	1687	1	Queen triggerfish	1	G0033814	17	1.17
main1	2021-04-14	3	70		1	16:49:00	1703	1	Porcupinefish	1
main1	2021-04-14	3	70		1	16:49:00	1703	1	Porcupinefish	2	G0034009
main1	2021-04-14	2	68		1	16:49:00	1703	1	Porcupinefish	1	G0039117
main1	2021-04-14	2	68		1	16:52:00	1706	1	Queen triggerfish	1	G0039143	18	1.18
main1	2021-04-14	2	68		1	17:08:00	1722	1	Queen triggerfish	1	G0039335	19	1.19
main1	2021-04-14	2	67		1	17:08:00	1722	1	Queen triggerfish	2	G0039336	19	1.19
main1	2021-04-14	2	67	t_r	1	17:08:00	1722	1	Queen triggerfish	4	G0039337	19	1.19
main1	2021-04-14	3	70		1	17:10:00	1724	2	Queen triggerfish	1	G0034263	19	1.19
main1	2021-04-14	2	67		1	17:10:00	1724	1	Queen triggerfish	1	G0039364	19	1.19
main1	2021-04-14	2	67		1	17:19:00	1733	1	Queen triggerfish	1	G0039475	19	1.19
main1	2021-04-14	2	67		1	17:19:00	1733	1	Queen triggerfish	2	G0039477	19	1.19
main1	2021-04-14	3	69		1	17:20:00	1734	1	Queen triggerfish	2	G0034376	19	1.19
main1	2021-04-14	3	69		1	17:20:00	1734	1	Queen triggerfish	1	G0034417	19	1.19
main1	2021-04-14	5	63		1	17:21:00	1735	1	Queen triggerfish	2	G0040781	19	1.19
main1	2021-04-14	5	63		1	17:21:00	1735	1	Queen triggerfish	3		19	1.19
main1	2021-04-14	5	63	b_l	1	17:21:00	1735	1	Queen triggerfish	4	G0040783	19	1.19
main1	2021-04-14	2	67		1	17:21:00	1735	1	Queen triggerfish	1	G0039499	19	1.19
main1	2021-04-14	5	63		1	17:23:00	1737	1	Queen triggerfish	1	G0040803	19	1.19
main1	2021-04-14	2	67		1	17:27:00	1741	1	Queen triggerfish	1	G0039572	19	1.19
main1	2021-04-14	3	69		1	17:55:00	1769	1	Queen triggerfish	1	G0034801	20	1.20
main1	2021-04-14	3	69		1	17:56:00	1770	1	Queen triggerfish	3	G0034809	20	1.20
main1	2021-04-14	3	69	t_l	1	17:56:00	1770	1	Queen triggerfish	4	G0034810	20	1.20
main1	2021-04-14	3	69		1	17:56:00	1770	1	Queen triggerfish	2		20	1.20
main1	2021-04-14	3	69	b_r	1	17:56:00	1770	1	Queen triggerfish	4	G0034816	20	1.20
main1	2021-04-14	3	69		1	17:56:00	1770	1	Queen triggerfish	5	G0034818	20	1.20
main1	2021-04-14	2	67		1	17:56:00	1770	1	Porcupinefish	1	G0039915
main1	2021-04-14	3	69		1	17:57:00	1771	1	Queen triggerfish	6		20	1.20
main1	2021-04-14	3	69	t_r	1	17:57:00	1771	1	Queen triggerfish	4	G0034826	20	1.20
main1	2021-04-14	3	69		1	17:57:00	1771	1	Queen triggerfish	2		20	1.20
main1	2021-04-14	3	69	t_r	1	17:57:00	1771	1	Queen triggerfish	4		20	1.20
main1	2021-04-14	3	69		1	17:57:00	1771	1	Queen triggerfish	2		20	1.20
main1	2021-04-14	2	68	t_l	1	17:58:00	1772	1	Queen triggerfish	3	G0039944	20	1.20
main1	2021-04-14	2	68	t_l	1	17:58:00	1772	1	Queen triggerfish	4	G0039945	20	1.20
main1	2021-04-14	5	63		1	18:00:00	1774	1	Queen triggerfish	1	G0041248	20	1.20
main1	2021-04-14	2	68		1	18:11:00	1785	1	Queen triggerfish	1	G0040100	20	1.20
main1	2021-04-15	3	70		2	06:20:00	2514	1	Queen triggerfish	2	G0043749	1	2.1
main1	2021-04-15	3	70		2	06:21:00	2515	1	Queen triggerfish	1	G0043759	1	2.1
main1	2021-04-15	5	63		2	06:21:00	2515	1	Queen triggerfish	1	G0050139	1	2.1
main1	2021-04-15	2	68		2	06:21:00	2515	1	Queen triggerfish	1	G0048857	1	2.1
main1	2021-04-15	2	68		2	06:26:00	2520	1	Queen triggerfish	1	G0048912	1	2.1
main1	2021-04-15	2	68		2	06:30:00	2524	1	Caribbean spiny lobster	1	G0048962
main1	2021-04-15	2	68		2	06:33:00	2527	2	Caribbean spiny lobster	1	G0049002
main1	2021-04-15	5	64		2	06:34:00	2528	1	Caribbean spiny lobster	2	G0050294
main1	2021-04-15	2	67		2	06:34:00	2528	2	Caribbean spiny lobster	2	G0049018
main1	2021-04-15	2	67		2	06:35:00	2529	1	Caribbean spiny lobster	2	G0049020
main1	2021-04-15	2	68		2	06:35:00	2529	1	Caribbean spiny lobster	2	G0049026
main1	2021-04-15	5	63		2	07:17:00	2571	1	Queen triggerfish	2	G0050814	2	2.2
main1	2021-04-15	3	70		2	09:44:00	2718	1	Queen triggerfish	1	G0046192	3	2.3
main1	2021-04-15	3	69		2	09:44:00	2718	1	Queen triggerfish	2	G0046193	3	2.3
main1	2021-04-15	5	64		2	09:57:00	2731	1	Queen triggerfish	2	G0052730	4	2.4
main1	2021-04-15	5	63		2	09:57:00	2731	1	Queen triggerfish	2	G0052732	4	2.4
main1	2021-04-15	5	63		2	10:15:00	2749	1	Queen triggerfish	2	G0052946	5	2.5
main1	2021-04-15	5	64		2	10:17:00	2751	1	Queen triggerfish	3	G0052966	5	2.5
main1	2021-04-15	3	69		2	10:22:00	2756	1	Queen triggerfish	1	G0046649	5	2.5
main1	2021-04-15	3	69		2	10:22:00	2756	1	Queen triggerfish	2	G0046649	5	2.5
main2	2021-04-16	2	67		3	11:06:00	4240	1	Queen triggerfish	2	G0020027	1	3.1
main2	2021-04-16	4	61		3	11:17:00	4251	1	Queen triggerfish	2	G0011322	2	3.2
main2	2021-04-16	4	61		3	11:18:00	4252	1	Queen triggerfish	1	G0011325	2	3.2
main2	2021-04-16	4	61		3	11:18:00	4252	1	Queen triggerfish	2	G0011333	2	3.2
main2	2021-04-16	2	67		3	11:18:00	4252	1	Queen triggerfish	1	G0020163	2	3.2
main2	2021-04-16	4	61		3	11:22:00	4256	1	Queen triggerfish	1	G0011373	2	3.2
main2	2021-04-16	5	64		3	11:22:00	4256	1	Queen triggerfish	2	G0015067	2	3.2
main2	2021-04-16	2	67		3	11:44:00	4278	1	Queen triggerfish	1	G0020480	3	3.3
main2	2021-04-16	4	61		3	11:54:00	4288	1	Queen triggerfish	2	G0011760	3	3.3
main2	2021-04-16	5	63		3	12:28:00	4322	1	Queen triggerfish	2	G0015863	4	3.4
main2	2021-04-16	5	64		3	12:28:00	4322	1	Queen triggerfish	2	G0015867	4	3.4
main2	2021-04-16	5	64		3	12:28:00	4322	1	Queen triggerfish	1	G0015873	4	3.4
main2	2021-04-16	2	67		3	12:29:00	4323	1	Queen triggerfish	2	G0021014	4	3.4
main2	2021-04-16	2	67		3	12:29:00	4323	1	Queen triggerfish	1	G0021015	4	3.4
main2	2021-04-16	2	67		3	12:39:00	4333	1	Queen triggerfish	1	G0021136	4	3.4
main2	2021-04-16	2	67		3	12:39:00	4333	1	Queen triggerfish	1	G0021144	4	3.4
main2	2021-04-16	5	63		3	13:13:00	4367	1	Queen triggerfish	2	G0016409	5	3.5
main2	2021-04-16	2	67		3	13:14:00	4368	1	Queen triggerfish	2	G0021560	5	3.5
main1	2021-04-16	3	69		3	14:06:00	2980	1	Queen triggerfish	2	G0020095	6	3.6
main1	2021-04-16	3	70		3	14:25:00	2999	1	Queen triggerfish	2	G0020328	7	3.7
main2	2021-04-16	2	67		3	14:25:00	4439	1	Queen triggerfish	1	G0022409	7	3.7
main2	2021-04-16	2	68		3	14:25:00	4439	1	Queen triggerfish	2	G0022410	7	3.7
main2	2021-04-16	3	69		3	14:38:00	4452	1	Queen triggerfish	2	G0020479	8	3.8
main2	2021-04-16	2	68		3	14:41:00	4455	1	Queen triggerfish	1	G0022607	8	3.8
main2	2021-04-16	4	61		3	14:42:00	4456	1	Queen triggerfish	2	G0013772	8	3.8
main2	2021-04-16	3	69		3	14:43:00	4457	1	Queen triggerfish	1	G0020546	8	3.8
main2	2021-04-16	3	70		3	14:44:00	4458	1	Queen triggerfish	2	G0020551	8	3.8
main2	2021-04-16	4	61		3	14:44:00	4458	1	Queen triggerfish	1	G0013795	8	3.8
main2	2021-04-16	3	70		3	14:47:00	4461	1	Queen triggerfish	2	G0020590	8	3.8
main2	2021-04-16	3	70	t_r	3	14:47:00	4461	1	Queen triggerfish	4	G0020591	8	3.8
main2	2021-04-16	3	70		3	14:47:00	4461	1	Queen triggerfish	2		8	3.8
main2	2021-04-16	3	70		3	14:48:00	4462	1	Queen triggerfish	4		8	3.8
main2	2021-04-16	3	70		3	14:48:00	4462	1	Queen triggerfish	2		8	3.8
main2	2021-04-16	3	70		3	14:49:00	4463	1	Queen triggerfish	4		8	3.8
main2	2021-04-16	3	70	b_r	3	14:50:00	4464	1	Queen triggerfish	4	G0020620	8	3.8
main2	2021-04-16	3	70	t_r	3	14:50:00	4464	1	Queen triggerfish	4	G0020625	8	3.8
main2	2021-04-16	3	69	t_r	3	14:51:00	4465	1	Queen triggerfish	4	G0020636	8	3.8
main2	2021-04-16	3	70		3	14:51:00	4465	1	Queen triggerfish	2	G0020638	8	3.8
main2	2021-04-16	4	61		3	14:51:00	4465	1	Queen triggerfish	2	G0013885	8	3.8
main2	2021-04-16	3	70	t_r	3	14:52:00	4466	1	Queen triggerfish	4	G0020649	8	3.8
main2	2021-04-16	4	62		3	14:52:00	4466	1	Queen triggerfish	3	G0013900	8	3.8
main2	2021-04-16	3	70		3	14:57:00	4471	1	Queen triggerfish	2	G0020706	8	3.8
main2	2021-04-16	2	68		3	14:59:00	4473	1	Queen triggerfish	1	G0022822	8	3.8
main2	2021-04-16	4	62		3	16:03:00	4537	1	Queen triggerfish	1	G0014754	9	3.9
main2	2021-04-16	2	67		3	16:04:00	4538	1	Queen triggerfish	2	G0023600	9	3.9
main2	2021-04-16	2	67	b_l	3	16:04:00	4538	1	Queen triggerfish	4	G0023601	9	3.9
main2	2021-04-16	2	67		3	16:04:00	4538	1	Queen triggerfish	2	G0023602	9	3.9
main2	2021-04-16	2	67		3	16:18:00	4552	1	Queen triggerfish	2	G0023765	10	3.10
main2	2021-04-16	4	61		3	17:17:00	4611	1	Queen triggerfish	3	G0015638	11	3.11
main2	2021-04-16	2	67		3	17:23:00	4617	1	Queen triggerfish	1	G0024547	11	3.11
main2	2021-04-16	2	67		3	17:35:00	4629	1	Queen triggerfish	2	G0024695	11	3.11
main1	2021-04-16	3	64		3	12:20:00	2874	1	Porcupinefish	1	G0018828
main2	2021-04-16	4	62		3	15:13:00	4487	1	Porcupinefish		G0014146
main2	2021-04-16	4	61		3	17:17:00	4611	1	Caribbean spiny lobster	2	G0015636
main2	2021-04-16	3	70		3		3574	1	Queen triggerfish	2
main2	2021-04-16	3	70		3		3574	1	Queen triggerfish	2
main2	2021-04-16	3	70		3		3574	1	Queen triggerfish	2
main2	2021-04-16	3	70		3		3574	1	Queen triggerfish	1
main2	2021-04-17	4	62	t_r	4	06:21:00	5395	1	Queen triggerfish	4	G0025047	1	4.1
main2	2021-04-17	2	67		4	06:21:00	5395	1	Queen triggerfish	2	G0033878	1	4.1
main2	2021-04-17	4	62		4	06:22:00	5396	1	Queen triggerfish	2		1	4.1
main2	2021-04-17	2	68		4	06:23:00	5397	1	Queen triggerfish	2	G0033911	1	4.1
main2	2021-04-17	2	68	b_l	4	06:24:00	5398	1	Queen triggerfish	4	G0033915	1	4.1
main2	2021-04-17	2	68		4	06:24:00	5398	1	Queen triggerfish	2	G0033920	1	4.1
main2	2021-04-17	2	67	b_l	4	06:24:00	5398	1	Queen triggerfish	3	G0033921	1	4.1
main2	2021-04-17	2	67	b_l	4	06:24:00	5398	1	Queen triggerfish	3	G0033922	1	4.1
main2	2021-04-17	4	62		4	06:25:00	5399	1	Queen triggerfish	1	G0025091	1	4.1
main2	2021-04-17	2	67		4	06:25:00	5399	1	Queen triggerfish	2	G0033927	1	4.1
main2	2021-04-17	2	67		4	06:28:00	5402	1	Queen triggerfish	1	G0033972	1	4.1
main2	2021-04-17	2	68		4	06:50:00	5424	1	Queen triggerfish	2	G0034237	2	4.2
main2	2021-04-17	3	70		4	07:22:00	5456	1	Queen triggerfish	1	G0032529	3	4.3
main2	2021-04-17	5	64		4	07:22:00	5456	1	Queen triggerfish	2	G0029472	3	4.3
main2	2021-04-17	4	62		4	07:25:00	5459	1	Queen triggerfish	1	G0025817	3	4.3
main2	2021-04-17	2	68		4	07:25:00	5459	1	Queen triggerfish	1	G0034651	3	4.3
main2	2021-04-17	4	62		4	07:26:00	5460	1	Queen triggerfish	3	G0025820	3	4.3
main2	2021-04-17	3	70		4	08:04:00	5498	1	Queen triggerfish	2	G0033033	4	4.4
main2	2021-04-17	5	64		4	08:05:00	5499	1	Queen triggerfish	1	G0029992	4	4.4
main2	2021-04-17	2	68		4	08:05:00	5499	1	Queen triggerfish	2	G0035133	4	4.4
main2	2021-04-17	2	68		4	08:59:00	5553	1	Queen triggerfish	1	G0035783	5	4.5
main2	2021-04-17	2	68		4	09:57:00	5611	1	Queen triggerfish	1	G0036478	6	4.6
main2	2021-04-17	2	68		4	10:02:00	5616	1	Queen triggerfish	1	G0036538	6	4.6
main2	2021-04-17	2	68		4	12:15:00	5749	1	Queen triggerfish	2	G0038134	7	4.7
main2	2021-04-17	4	62		4	13:18:00	5812	1	Queen triggerfish	1	G0030050	8	4.8
main2	2021-04-17	2	68		4	13:18:00	5812	1	Queen triggerfish	1	G0038888	8	4.8
main2	2021-04-17	2	68		4	14:13:00	5867	1	Queen triggerfish	2	G0039547	9	4.9
main2	2021-04-17	2	67		4	14:13:00	5867	1	Queen triggerfish	2	G0039548	9	4.9
main2	2021-04-17	3	69		4	14:34:00	5888	1	Queen triggerfish	2	G0037719	10	4.10
main2	2021-04-17	2	67		4	16:40:00	6014	1	Queen triggerfish	1	G0041314	11	4.11
main2	2021-04-17	2	67		4	17:16:00	6050	1	Queen triggerfish	1	G0041751	12	4.12
main2	2021-04-17	4	62		4	17:17:00	6051	1	Queen triggerfish	2	G0032919	12	4.12
main2	2021-04-17	5	64		4	17:17:00	6051	1	Queen triggerfish	1	G0036610	12	4.12
main2	2021-04-17	2	67		4	17:53:00	6087	1	Queen triggerfish	1	G0042184	13	4.13
main2	2021-04-17	2	67		4	17:56:00	6090	1	Queen triggerfish	1	G0042227	13	4.13
main2	2021-04-17	2	67		4	17:56:00	6090	1	Caribbean spiny lobster	2	G0042231
main2	2021-04-17	4	62		4	17:57:00	6091	1	Caribbean spiny lobster	2	G0033403
main2	2021-04-17	5	64		4	17:57:00	6091	1	Caribbean spiny lobster	1	G0037089
main2	2021-04-17	5	63		4	17:57:00	6091	1	Queen triggerfish	2	G0037095	13	4.13
main2	2021-04-17	2	68		4	17:57:00	6091	1	Caribbean spiny lobster	2	G0042234
main2	2021-04-17	2	68	b_l	4	18:27:00	6121	1	Queen triggerfish	3	G0042603	14	4.14
main2	2021-04-17	3	70		4	18:28:00	6122	1	Queen triggerfish	2	G0040529	14	4.14
main2	2021-04-17	2	68	b_l	4	18:28:00	6122	1	Queen triggerfish	4	G0042606	14	4.14
main2	2021-04-17	2	68		4	18:28:00	6122	1	Queen triggerfish	2	G0042608	14	4.14
main2	2021-04-18	4	62		5	05:48:00	6802	1	Queen triggerfish	2	G0041927	1	5.1
main2	2021-04-18	5	64		5	06:01:00	6815	1	Queen triggerfish	2	G0045780	2	5.2
main2	2021-04-18	5	64		5	06:03:00	6817	1	Queen triggerfish	1	G0045812	2	5.2
main2	2021-04-18	2	68		5	06:12:00	6826	1	Queen triggerfish	1	G0051064	2	5.2
main2	2021-04-18	5	64		5	06:15:00	6829	1	Queen triggerfish	1	G0045955	2	5.2
main2	2021-04-18	2	68		5	06:15:00	6829	1	Queen triggerfish	1	G0051096	2	5.2
main2	2021-04-18	2	68		5	06:17:00	6831	1	Queen triggerfish	1	G0051116	2	5.2
main2	2021-04-18	2	68		5	06:17:00	6831	1	Queen triggerfish	2	G0051118	2	5.2
main2	2021-04-18	2	67		5	06:19:00	6833	1	Queen triggerfish	2	G0051139	2	5.2
main2	2021-04-18	2	67		5	06:21:00	6835	1	Queen triggerfish	1	G0051169	2	5.2
main2	2021-04-18	2	68		5	06:25:00	6839	1	Caribbean spiny lobster	2	G0051215
main2	2021-04-18	2	68		5	08:02:00	6936	1	Queen triggerfish	2	G0052383	3	5.3
main2	2021-04-18	2	68		5	08:07:00	6941	1	Caribbean spiny lobster	1	G0052443
main2	2021-04-18	2	67		5	10:06:00	7060	1	Queen triggerfish	1	G0053865	4	5.4
main2	2021-04-18	2	67		5	11:29:00	7143	1	Queen triggerfish	1	G0054860	5	5.5
main3	2021-04-22	2	70		9	10:53:00	9987	1	Queen triggerfish	2	G0049314	4	9.4
main3	2021-04-20	3	67		7	14:17:00	10191	1	Queen triggerfish	1	G0019568	1	7.1
main3	2021-04-20	3	67		7	14:17:00	10191	1	Queen triggerfish	2	G0019572	1	7.1
main3	2021-04-20	5	68		7	14:17:00	10191	1	Queen triggerfish	1	G0017063	1	7.1
main3	2021-04-20	3	68		7	14:18:00	10192	1	Queen triggerfish	2	G0019575	1	7.1
main3	2021-04-20	3	68		7	14:21:00	10195	1	Queen triggerfish	1	G0019616	1	7.1
main3	2021-04-20	3	67		7	14:21:00	10195	1	Queen triggerfish	2	G0019617	1	7.1
main3	2021-04-20	5	64		7	14:25:00	10199	1	Queen triggerfish	2	G0017160	1	7.1
main3	2021-04-20	5	63		7	14:25:00	10199	1	Queen triggerfish	2	G0017161	1	7.1
main3	2021-04-20	3	67		7	15:06:00	10240	1	Queen triggerfish	2	G0020153	2	7.2
main3	2021-04-20	5	64		7	15:06:00	10240	1	Queen triggerfish	2	G0017643	2	7.2
main3	2021-04-20	5	63		7	15:09:00	10243	1	Queen triggerfish	2	G0017682	2	7.2
main3	2021-04-20	3	67		7	17:43:00	10397	1	Porcupinefish	1	G0022035
main3	2021-04-20	5	63		7	17:43:00	10397	1	Porcupinefish	1	G0019528
main3	2021-04-20	4	70		7	17:44:00	10398	1	Porcupinefish	1	G0018882
main3	2021-04-20	5	63		7	17:45:00	10399	1	Porcupinefish	1	G0019550
main3	2021-04-20	2	64		7	18:28:00	10442	1	Caribbean spiny lobster	1	G0020218
main3	2021-04-20	5	63		7	18:30:00	10444	1	Caribbean spiny lobster	2	G0020092
main3	2021-04-20	5	64		7	18:30:00	10444	1	Caribbean spiny lobster	2	G0020100
main3	2021-04-21	3	67		8	06:24:00	11158	1	Queen triggerfish	1	G0031167	1	8.1
main3	2021-04-21	3	67		8	06:24:00	11158	1	Queen triggerfish	1	G0031176	1	8.1
main3	2021-04-21	2	70		8	06:43:00	11177	1	Queen triggerfish	1	G0029038	2	8.2
main3	2021-04-21	5	64		8	06:44:00	11178	1	Queen triggerfish	2	G0028900	2	8.2
main3	2021-04-21	5	64		8	06:44:00	11178	1	Queen triggerfish	1	G0028905	2	8.2
main3	2021-04-21	5	64		8	07:31:00	11225	1	Porcupinefish	1	G0029468
main3	2021-04-21	4	70		8	07:32:00	11226	1	Porcupinefish	1	G0028822
main3	2021-04-21	5	63		8	08:07:00	11261	1	Queen triggerfish	1	G0029899	3	8.3
main3	2021-04-21	5	63		8	08:22:00	11276	1	Spanish hogfish	2	G0030086
main3	2021-04-21	5	64	t_r	8	08:22:00	11276	1	Spanish hogfish	3	G0030087
main3	2021-04-21	5	64	t_r	8	08:23:00	11277	1	Spanish hogfish	4	G0030091
main3	2021-04-21	5	64		8	08:23:00	11277	1	Spanish hogfish	2	G0030094
main3	2021-04-21	4	62		8	08:30:00	11284	1	Spanish hogfish	2	G0029523
main3	2021-04-21	3	67		8	08:33:00	11287	1	Spanish hogfish	2	G0032725
main3	2021-04-21	5	64		8	08:34:00	11288	1	Spanish hogfish	2	G0030223
main3	2021-04-21	4	62		8	08:45:00	11299	1	Spanish hogfish	2	G0029694
main3	2021-04-21	5	64		8	09:16:00	11330	1	Queen triggerfish	2	G0030734	4	8.4
main3	2021-04-21	5	63		8	09:20:00	11334	1	Queen triggerfish	2	G0030772	4	8.4
main3	2021-04-21	3	68		8	09:33:00	11347	1	Spanish hogfish	2	G0032727
main3	2021-04-21	3	68		8	09:33:00	11347	2	Spanish hogfish	2	G0032727
main3	2021-04-21	5	63		8	10:14:00	11388	1	Queen triggerfish	2	G0031431	5	8.5
main3	2021-04-21	3	68		8	10:15:00	11389	1	Queen triggerfish	2	G0033939	5	8.5
main3	2021-04-21	4	61		8	13:01:00	11555	1	Spanish hogfish	2	G0032773
main3	2021-04-21	3	68		8	13:55:00	11609	1	Queen triggerfish	1	G0036581	6	8.6
main3	2021-04-21	2	70		8	14:23:00	11637	1	Bandtail puffer fish	1	G0034557
main3	2021-04-21	3	68		8	17:03:00	11797	1	Queen triggerfish	2	G0038845	7	8.7
main3	2021-04-21	5	63		8	17:14:00	11808	1	Bandtail puffer fish	1	G0036460
main3	2021-04-21	3	68		8	17:20:00	11814	1	Saucereye porgy	1	G0039041
main3	2021-04-21	3	68		8	17:24:00	11818	1	Queen triggerfish	1	G0039088	8	8.8
main3	2021-04-21	2	70		8	17:37:00	11831	1	Queen triggerfish	1	G0036885	9	8.9
main3	2021-04-21	3	68		8	17:37:00	11831	1	Queen triggerfish	1	G0039248	9	8.9
main3	2021-04-22	5	64		9	05:58:00	12572	1	Caribbean spiny lobster	2	G0045635
main3	2021-04-22	5	63		9	05:58:00	12572	1	Caribbean spiny lobster	2	G0045636
main3	2021-04-22	2	70		9	05:59:00	12573	1	Queen triggerfish	2	G0045783	1	9.1
main3	2021-04-22	2	70		9	05:59:00	12573	1	Caribbean spiny lobster	1	G0045784
main3	2021-04-22	2	70		9	05:59:00	12573	1	Caribbean spiny lobster	2	G0045786
main3	2021-04-22	4	62		9	05:59:00	12573	1	Caribbean spiny lobster	2	G0044982
main3	2021-04-22	5	63		9	06:06:00	12580	1	Porcupinefish	1	G0045732
main3	2021-04-22	5	63		9	06:21:00	12595	1	Porcupinefish	1	G0045914
main3	2021-04-22	5	63		9	07:31:00	12665	1	Queen triggerfish	2	G0046750	2	9.2
main3	2021-04-22	4	62		9	07:44:00	12678	1	Queen triggerfish	2	G0046246	3	9.3
main3	2021-04-22	4	61		9	13:05:00	12999	1	Queen triggerfish	2	G0050105	5	9.5
main3	2021-04-22	5	63		9	13:07:00	13001	1	Queen triggerfish	1	G0050789	5	9.5
main3	2021-04-22	5	63		9	13:13:00	13007	1	Queen triggerfish	2	G0050858	5	9.5

## Sheet: R attacks
reef	treatment	shelter_id	day	Attacks	urchin_count_beginning_this_day	urchin_count_beginning_next_day	Urchin_difference
62	diademacity	t_l	0	0	1	1	0
62	diademacity	t_r	0	1	1	1	0
62	diademacity	b_l	0	0	1	0	1
62	diademacity	b_r	0	6	1	1	0
62	diademacity	t_l	1	0	1	1	0		Number of observations:
62	diademacity	t_r	1	0	1	1	0		Urchin beginning	Urchin next day	average_amound
62	diademacity	b_l	1	0	0	0	0		1	0	21
62	diademacity	b_r	1	0	1	0	1		1	1	53
62	diademacity	back_t_l	1	0	0	1	-1
62	diademacity	t_l	2	0	1	2	-1
62	diademacity	t_r	2	0	1	1	0
62	diademacity	b_l	2	0	0	0	0
62	diademacity	b_r	2	0	0	0	0
62	diademacity	back_t_l	2	0	1	0	1
64	diademacity	t_l	0	5	1	1	0
64	diademacity	t_r	0	3	1	1	0
64	diademacity	b_l	0	8	1	0	1
64	diademacity	b_r	0	2	1	0	1
64	diademacity	t_l	1	0	1	1	0
64	diademacity	t_r	1	0	1	0	1
64	diademacity	b_l	1	0	0	0	0
64	diademacity	b_r	1	0	0	0	0
64	diademacity	t_l	2	0	1	1	0
64	diademacity	t_r	2	0	0	0	0
64	diademacity	b_l	2	0	0	0	0
64	diademacity	b_r	2	0	0	0	0
68	diademacity	t_l	0	4	1	1	0
68	diademacity	t_r	0	23	1	0	1
68	diademacity	b_l	0	2	1	1	0
68	diademacity	b_r	0	6	1	0	1
68	diademacity	back_t_r	0	0	0	1	-1
68	diademacity	t_l	1	3	1	0	1
68	diademacity	t_r	1	0	0	1	-1
68	diademacity	b_l	1	0	1	1	0
68	diademacity	b_r	1	0	0	0	0
68	diademacity	back_t_r	1	0	1	0	1
68	diademacity	t_l	2	0	0	1	-1
68	diademacity	t_r	2	0	1	1	0
68	diademacity	b_l	2	0	1	0	1
68	diademacity	b_r	2	0	0	0	0
70	diademacity	t_l	0	18	1	0	1
70	diademacity	t_r	0	2	1	1	0
70	diademacity	b_l	0	7	1	0	1
70	diademacity	b_r	0	5	1	1	0
70	diademacity	t_l	1	0	0	1	-1
70	diademacity	t_r	1	0	1	1	0
70	diademacity	b_l	1	0	0	0	0
70	diademacity	b_r	1	0	1	1	0
70	diademacity	t_l	2	0	1	1	0
70	diademacity	t_r	2	0	1	1	0
70	diademacity	b_l	2	0	0	0	0
70	diademacity	b_r	2	0	1	1	0
61	nursery	t_l	0	2	1	1	0
61	nursery	t_r	0	1	1	2	-1
61	nursery	b_l	0	2	1	1	0
61	nursery	b_r	0	2	1	0	1
61	nursery	t_l	1	0	1	1	0
61	nursery	t_r	1	0	2	1	1
61	nursery	b_l	1	0	1	1	0
61	nursery	b_r	1	0	0	0	0
61	nursery	t_m	1	0	0	1	-1
61	nursery	t_l	2	0	1	1	0
61	nursery	t_r	2	0	1	1	0
61	nursery	b_l	2	0	1	0	1
61	nursery	b_r	2	0	0	0	0
61	nursery	t_m	2	0	1	1	0
63	nursery	t_l	0	0	1	1	0
63	nursery	t_r	0	0	1	1	0
63	nursery	b_l	0	1	1	1	0
63	nursery	b_r	0	2	1	1	0
63	nursery	t_l	1	0	1	1	0
63	nursery	t_r	1	0	1	1	0
63	nursery	b_l	1	1	1	0	1
63	nursery	b_r	1	0	1	1	0
63	nursery	t_m	1	0	0	1	-1
63	nursery	t_l	2	0	1	1	0
63	nursery	t_r	2	0	1	2	-1
63	nursery	b_l	2	0	0	0	0
63	nursery	b_r	2	0	1	0	1
63	nursery	t_m	2	0	1	0	1
67	nursery	t_l	0	2	1	1	0
67	nursery	t_r	0	3	1	1	0
67	nursery	b_l	0	0	1	1	0
67	nursery	b_r	0	2	1	1	0
67	nursery	t_l	1	0	1	1	0
67	nursery	t_r	1	1	1	0	1
67	nursery	b_l	1	0	1	1	0
67	nursery	b_r	1	0	1	1	0
67	nursery	t_l	2	0	1	1	0
67	nursery	t_r	2	0	0	0	0
67	nursery	b_l	2	0	1	1	0
67	nursery	b_r	2	0	1	1	0
69	nursery	t_l	0	0	1	1	0
69	nursery	t_r	0	2	1	1	0
69	nursery	b_l	0	1	1	0	1
69	nursery	b_r	0	1	1	1	0
69	nursery	t_l	1	1	1	1	0
69	nursery	t_r	1	3	1	1	0
69	nursery	b_l	1	0	0	0	0
69	nursery	b_r	1	1	1	0	1
69	nursery	t_l	2	0	1	1	0
69	nursery	t_r	2	0	1	1	0
69	nursery	b_l	2	0	0	0	0
69	nursery	b_r	2	0	0	0	0

## Sheet: Table predators
name		1	2	3	4	5	6	7	8	9
		D. antillarum potential predator is present outside of a 50 cm virtual sphere around the artificial reef.	D. antillarum potential predator is present within a 50 cm virtual sphere around the artificial reef, but not within 10 cm radius around the shelter entrance.	D. antillarum potential predator is present within 10 cm around the shelter entrance of the artificial reef.	Interaction between D. antillarum potential predator and D. antillarum on the artificial reef.	D. antillarum potential predator is present within a 50 cm virtual cylinder around D. antillarum which is located outside the shelter.	D. antillarum potential predator attacks D. antillarum which is located outside the shelter.	D. antillarum potential predator feeds on D. antillarum outside the shelter.	D. antillarum is outside the shelter and present within a 50 cm radius around the artificial reef. D. antillarum potential predator is not present.	D. antillarum is outside the shelter and present outside of a 50 cm radius around the artificial reef. D. antillarum potential predator is not present.	Total actions per species:
Common name	Scientific name	Potential predator > 50cm of artificial reef	Potential predator < 50cm of artificial reef	Potential predator < 10cm of artificial reef	Interaction potential predator and D. antillarum	Potential predator <50 cm of D. antillarum outside shelter	Potential predator attacks D. antillarum outside shelter	Potential predator feeds on D. antillarum	D. antillarum outside the shelter, <50 cm of artificial reef, no potential predator	D. antillarum outside the shelter, >50 cm of artificial reef, no potential predator	Total actions per species:
Queen triggerfish	Balistes vetula	159	254	39	135	1	1	0	0	0	589
porcupinefish	Diodon hysterix	19	3	0	0	0	0	0	0	0	22
Caribbean spiny lobster	Panulirus argus	7	15	0	0	0	0	0	0	0	22
Spanish hogfish	Bodianus rufus	0	9	1	1	0	0	0	0	0	11
Bandtail puffer fish	Sphoeroides spengleri	2	0	0	0	0	0	0	0	0	2
Saucereye porgy	Calamus calamus	1	0	0	0	0	0	0	0	0	1
Total actions per code:		188	281	40	136	1	1	0	0	0	647

[truncated: 4 more sheets: Table independent visits, Wild vs lab table, R wild vs lab Queen trigger, Roving diver survey]
